# Supplementary material for: Modulating sensitivity and detection mechanism with spacer length: a new series of fluorescent turn on chemodosimeters for Pb2+ based on rhodamine–quinoline conjugates
Source: Royal Society of Chemistry journal article supplement (doi:10.1039/c6ra22764c), 2016-01-01
Supplement: c6ra22764c1.pdf [file c6ra22764c1.pdf]

## Electronic Supplementary Information

### Modulating sensitivity and detection mechanism with spacer chain length: a new series of fluorescent turn on chemodosimeters and a chemosensor for Pb<sup>2+</sup> based on rhodamine-quinoline conjugates

Manisha Devi,<sup>a</sup> Abhimanew Dhir,<sup>a</sup> Chullikkattil P. Pradeep<sup>a\*</sup>

School of Basic Science, Indian Institute of Technology Mandi, Kamand-175 005, Himachal Pradesh, India.

Fax: +91 1905 267009; Tel: +91 1905 267045; E-mail: [pradeep@iitmandi.ac.in](mailto:pradeep@iitmandi.ac.in)

|                                                                                                                                                                                                                                          |        |
|------------------------------------------------------------------------------------------------------------------------------------------------------------------------------------------------------------------------------------------|--------|
| 1. <sup>1</sup> H NMR and <sup>13</sup> C NMR spectra of <b>RHQ-1</b> .                                                                                                                                                                  | S2     |
| 2. IR and Mass spectra of <b>RHQ-1</b> .                                                                                                                                                                                                 | S3     |
| 3. <sup>1</sup> H NMR and <sup>13</sup> C NMR spectra of <b>RHQ-2</b> .                                                                                                                                                                  | S4     |
| 4. IR and Mass spectra of <b>RHQ-2</b> .                                                                                                                                                                                                 | S5     |
| 5. <sup>1</sup> H NMR and <sup>13</sup> C NMR spectra of <b>RHQ-3</b> .                                                                                                                                                                  | S6     |
| 6. IR and Mass spectra of <b>RHQ-3</b> .                                                                                                                                                                                                 | S7     |
| 7. <sup>1</sup> H NMR and <sup>13</sup> C NMR spectra of <b>RHQ-4</b> .                                                                                                                                                                  | S8     |
| 8. IR and Mass spectra of <b>RHQ-4</b> .                                                                                                                                                                                                 | S9     |
| 9. Fluorescence response of <b>RHQs 1-4</b> (1×10 <sup>-5</sup> M) in different solvents, λ <sub>ex</sub> = 530 nm.                                                                                                                      | S10    |
| 10. Comparison of the fluorescence intensity of <b>RHQs 1-4</b> on addition of various metal ions.                                                                                                                                       | S11    |
| 11. Fluorescence spectra of <b>RHQs 1-4</b> on addition of Pb <sup>2+</sup> .                                                                                                                                                            | S12    |
| 12. Fluorescence response of <b>RHQs 1-4</b> (1×10 <sup>-5</sup> M) in CH <sub>3</sub> CN:H <sub>2</sub> O (9.5:0.5 %, v/v) upon addition of respective metal ions, followed by addition of Pb <sup>2+</sup> . λ <sub>ex</sub> = 530 nm. | S13    |
| 13. Job's plot of <b>RHQs 1-4</b> .                                                                                                                                                                                                      | S14    |
| 14. Binding constants of <b>RHQs 1-4</b> with Pb <sup>2+</sup> .                                                                                                                                                                         | S15    |
| 15. Detection limit of <b>RHQs 1-4</b> towards Pb <sup>2+</sup> .                                                                                                                                                                        | S16-17 |
| 16. <sup>1</sup> H NMR and <sup>13</sup> C NMR spectra of <b>RHQ-1</b> in CD <sub>3</sub> CN-d <sub>3</sub> after addition of Pb <sup>2+</sup> .                                                                                         | S18    |
| 17. <sup>1</sup> H NMR and <sup>13</sup> C NMR spectra of <b>RHQ-2</b> in CD <sub>3</sub> CN-d <sub>3</sub> after addition of Pb <sup>2+</sup> .                                                                                         | S19    |
| 18. <sup>1</sup> H NMR and <sup>13</sup> C NMR spectra of <b>RHQ-3</b> in CD <sub>3</sub> CN-d <sub>3</sub> after addition of Pb <sup>2+</sup> .                                                                                         | S20    |
| 19. <sup>1</sup> H NMR and <sup>13</sup> C NMR spectra of <b>RHQ-4</b> in CD <sub>3</sub> CN-d <sub>3</sub> after addition of Pb <sup>2+</sup> .                                                                                         | S21    |
| 20. Mass spectrum of <b>RHQ-1</b> in presence of Pb <sup>2+</sup> .                                                                                                                                                                      | S22    |
| 21. Mass spectrum of <b>RHQ-2</b> in presence of Pb <sup>2+</sup> .                                                                                                                                                                      | S22    |
| 22. Mass spectrum of <b>RHQ-3</b> in presence of Pb <sup>2+</sup> .                                                                                                                                                                      | S23    |
| 23. Mass spectrum of <b>RHQ-4</b> in presence of Pb <sup>2+</sup> .                                                                                                                                                                      | S23    |
| 24. Proposed mechanism of Pb <sup>2+</sup> binding with <b>RHQ-1</b> .                                                                                                                                                                   | S24    |
| 25. Fluorescence spectra of <b>RHQ-1+Pb<sup>2+</sup></b> ensemble on addition of CH <sub>3</sub> COO <sup>-</sup> .                                                                                                                      | S25    |
| 26. Comparison of fluorescence intensities of <b>RHQ-1+Pb<sup>2+</sup></b> on addition various anions.                                                                                                                                   | S25    |
| 27. Detection limit of <b>RHQ-1+Pb<sup>2+</sup></b> ensemble towards CH <sub>3</sub> COO <sup>-</sup> .                                                                                                                                  | S25    |
| 28. Stern-Volmer plot of <b>RHQ-1+Pb<sup>2+</sup></b> ensemble with various equivalents of CH <sub>3</sub> COO <sup>-</sup> .                                                                                                            | S25    |
| 29. Comparison of fluorescence intensity at 586 nm of <b>RHQs+Pb<sup>2+</sup></b> ensemble on addition of various anions, λ <sub>ex</sub> = 530 nm.                                                                                      | S26    |
| 30. Fluorescence spectra of <b>RHQ-1-4</b> (1×10 <sup>-5</sup> M) upon addition of 0.060, 0.043, 0.020 and 3.04 equiv. of Pb(CH <sub>3</sub> COO) <sub>2</sub> in CH <sub>3</sub> CN: H <sub>2</sub> O (9.5:0.5 %, v/v) respectively.    | S26    |
| 31. Effect of pH on fluorescence intensity of <b>RHQs 1-4</b> (1×10 <sup>-5</sup> M) and <b>RHQs 1-4+Pb<sup>2+</sup></b> in Tris-HCl buffered (0.05M) solution.                                                                          | S27    |
| 32. Analytical application - test strips.                                                                                                                                                                                                | S27    |
| 33. Detection limits of <b>RHQs 1-4</b> towards Pb <sup>2+</sup> in tap water.                                                                                                                                                           | S28-29 |
| 34. Comparison of <b>RHQs</b> with various reported rhodamine-based chemosensors for Pb <sup>2+</sup> .                                                                                                                                  | S30    |

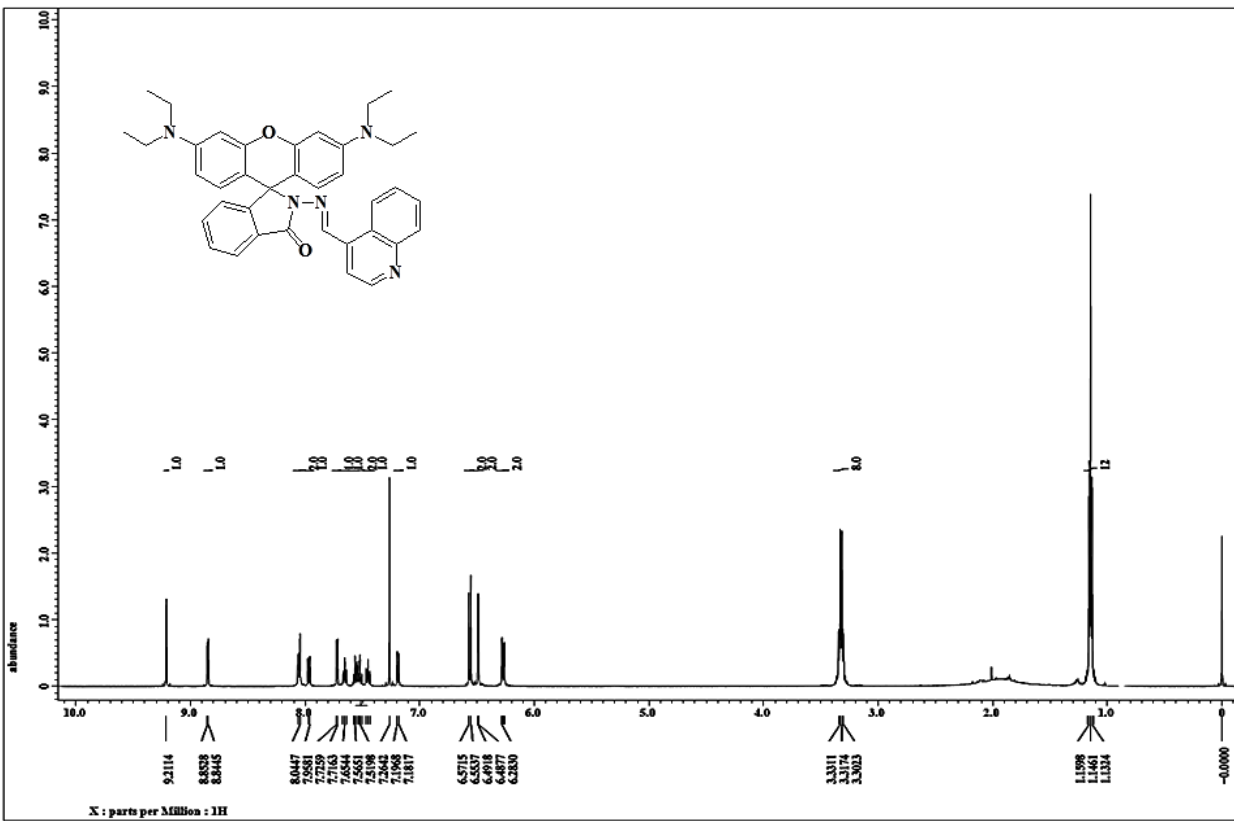

Fig. S1 <sup>1</sup>H NMR spectrum of RHQ-1.

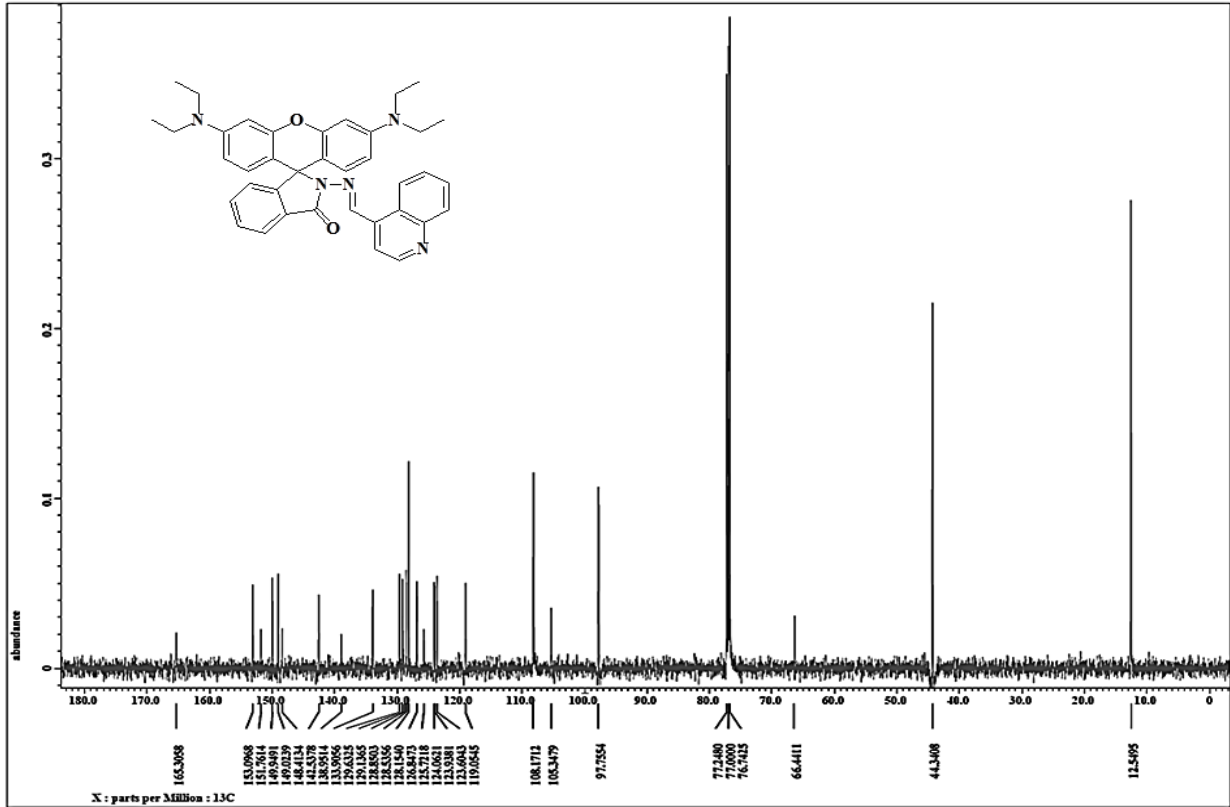

Fig. S2 <sup>13</sup>C NMR spectrum of RHQ-1.

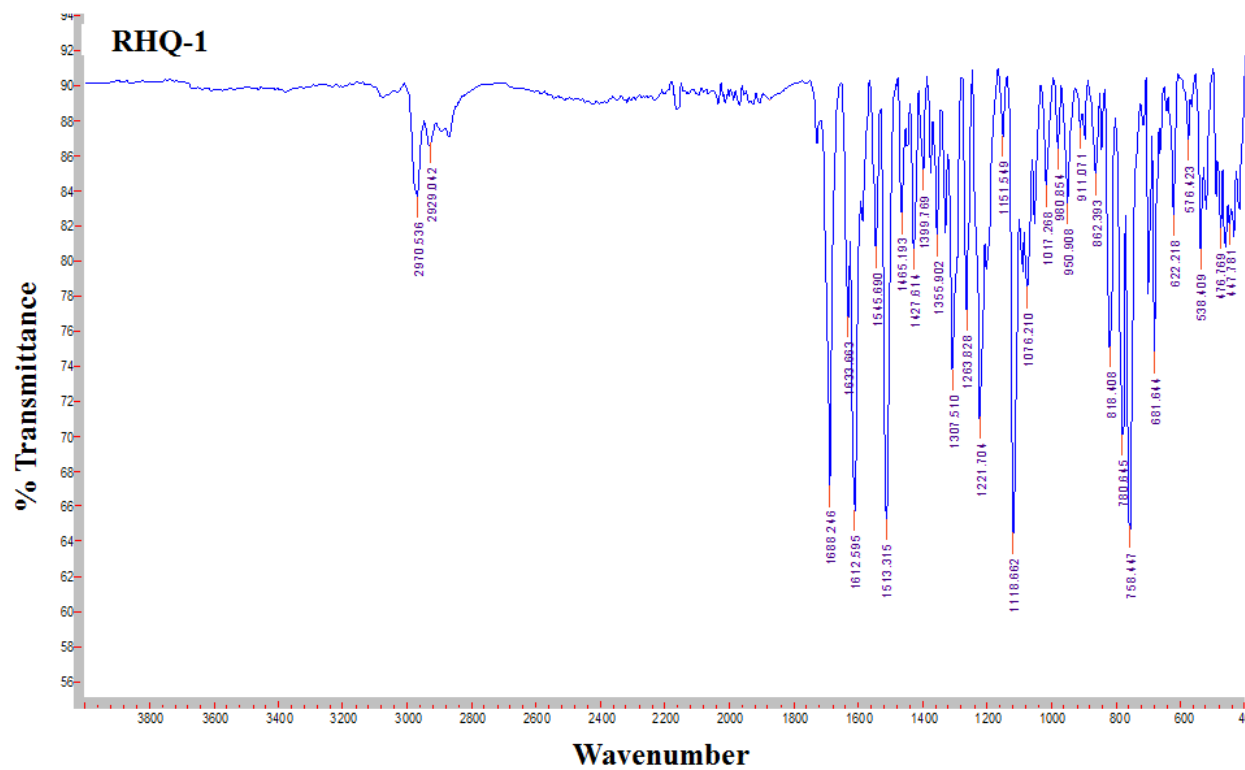

Fig. S3 IR spectrum of RHQ-1.

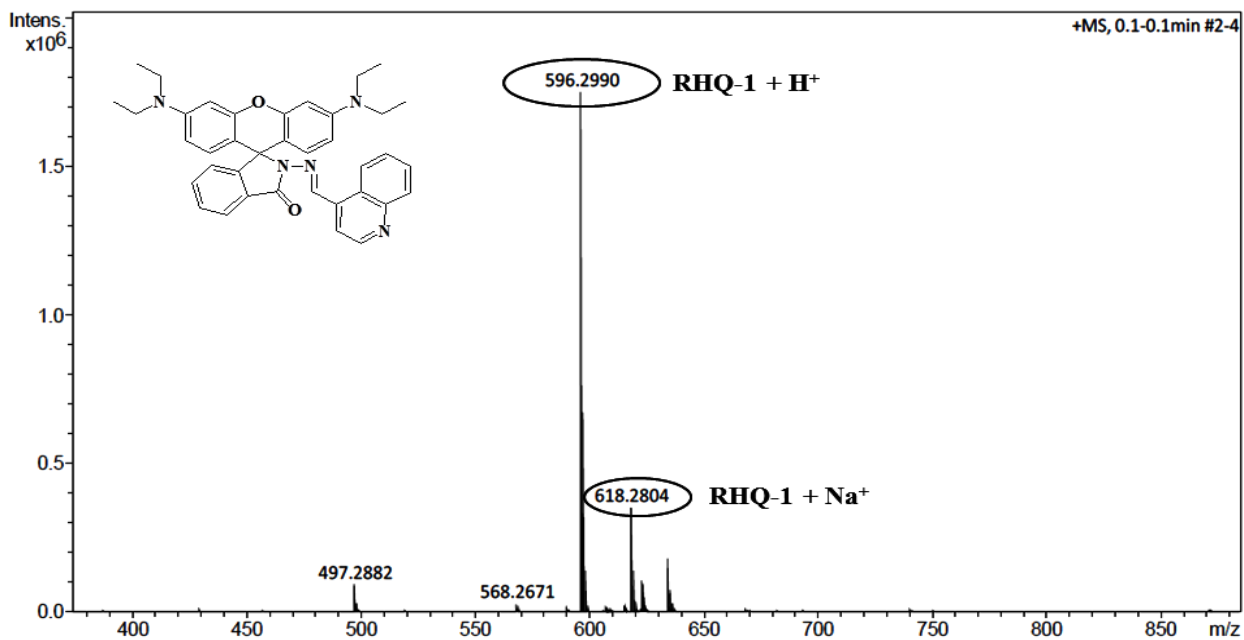

Fig. S4 Mass spectrum of RHQ-1.

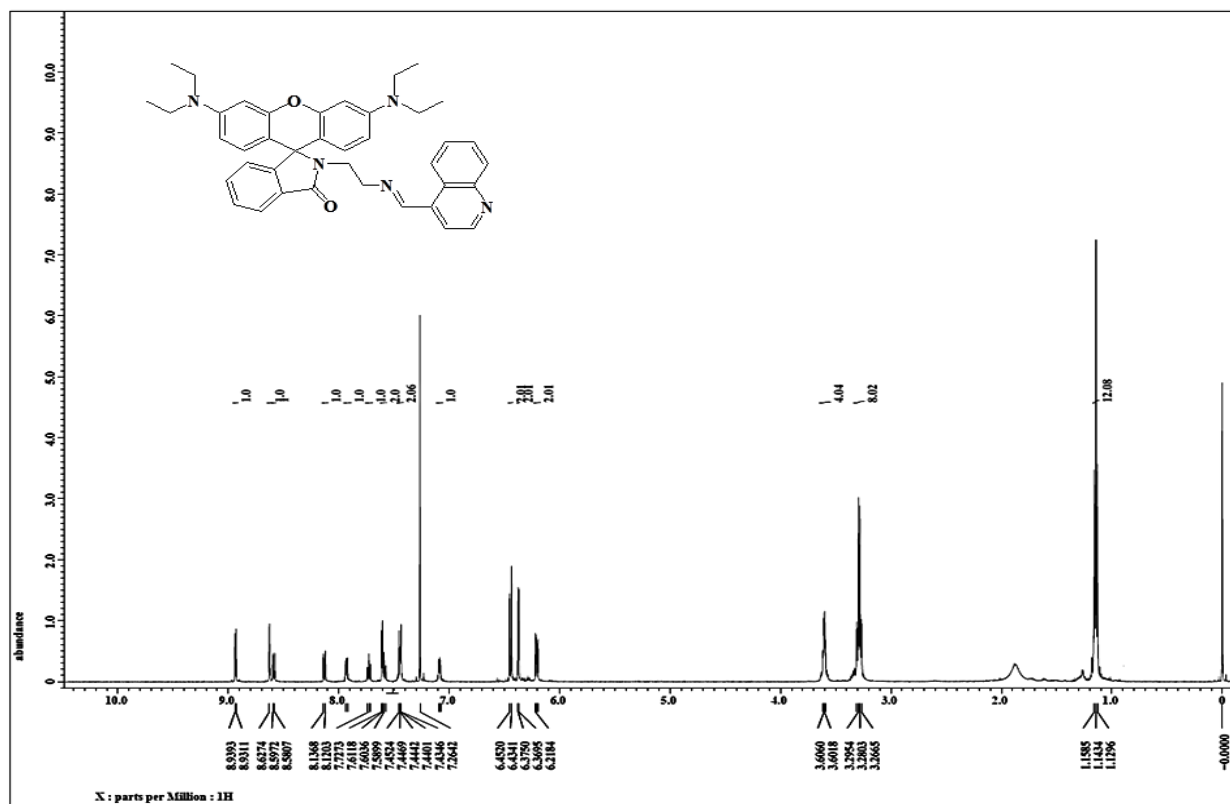

Fig. S5  $^1\text{H}$  NMR spectrum of RHQ-2.

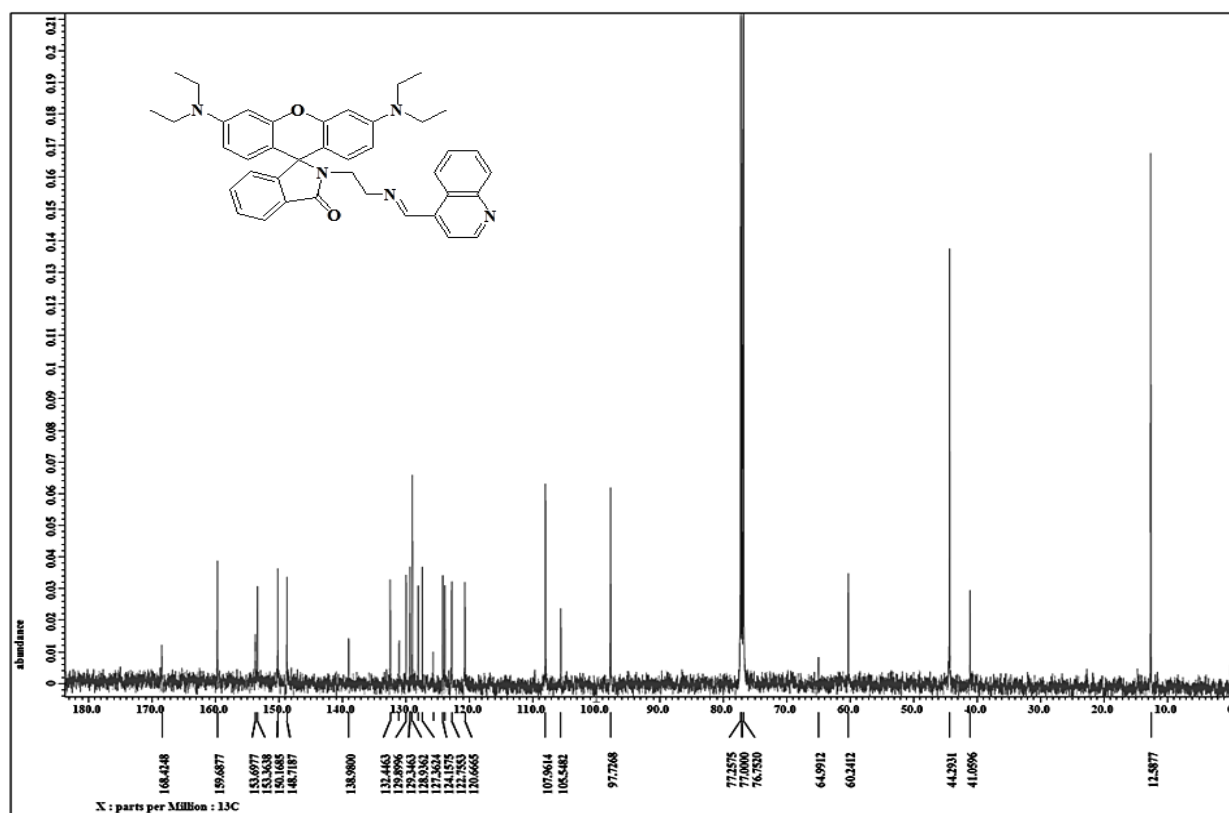

Fig. S6  $^{13}\text{C}$  NMR spectrum of RHQ-2.

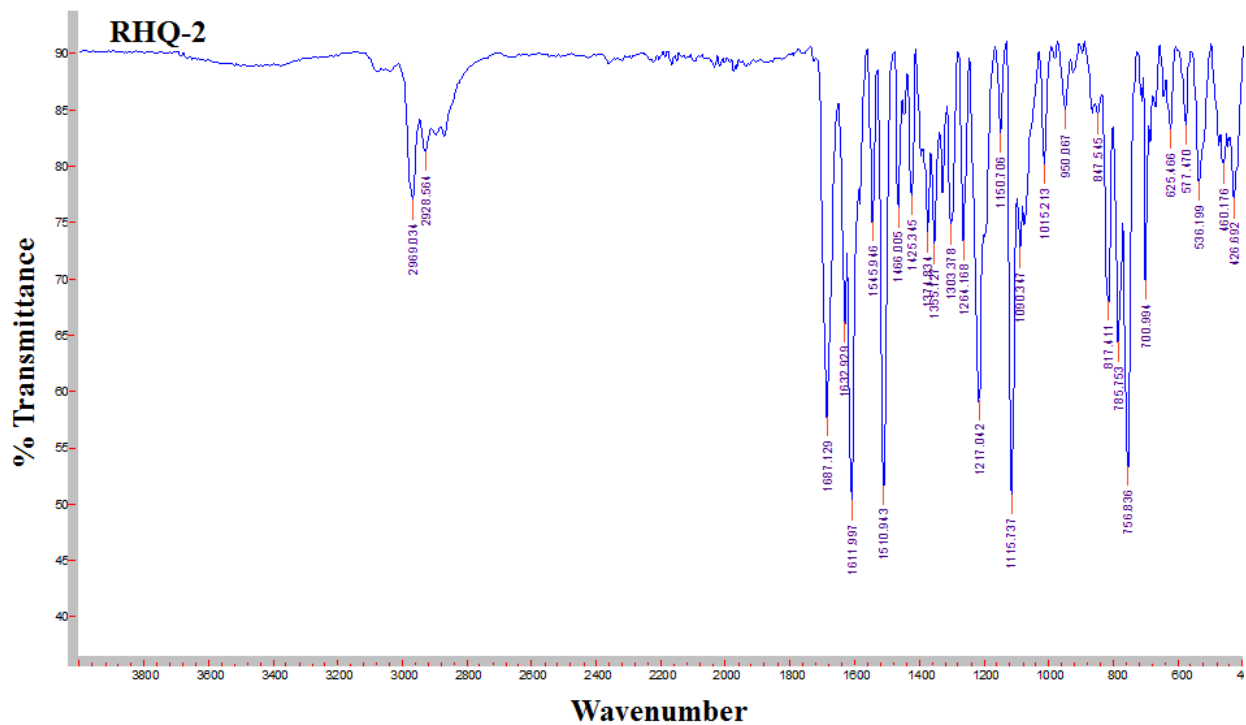

Fig. S7 IR spectrum of RHQ-2.

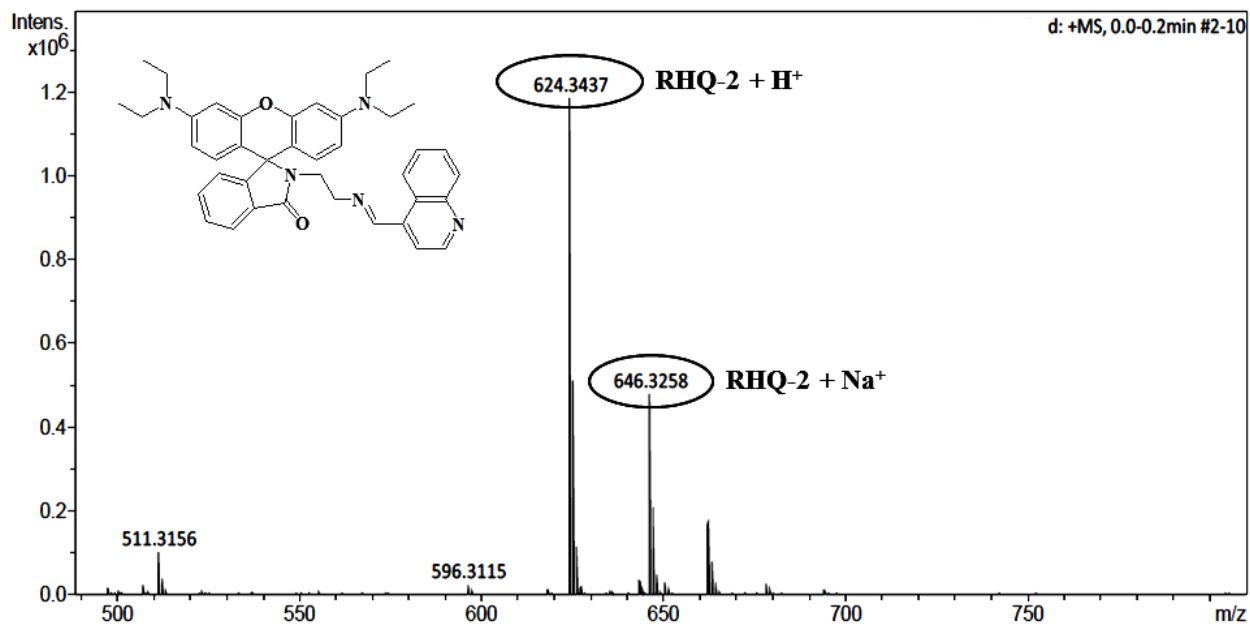

Fig. S8 Mass spectrum of RHQ-2.



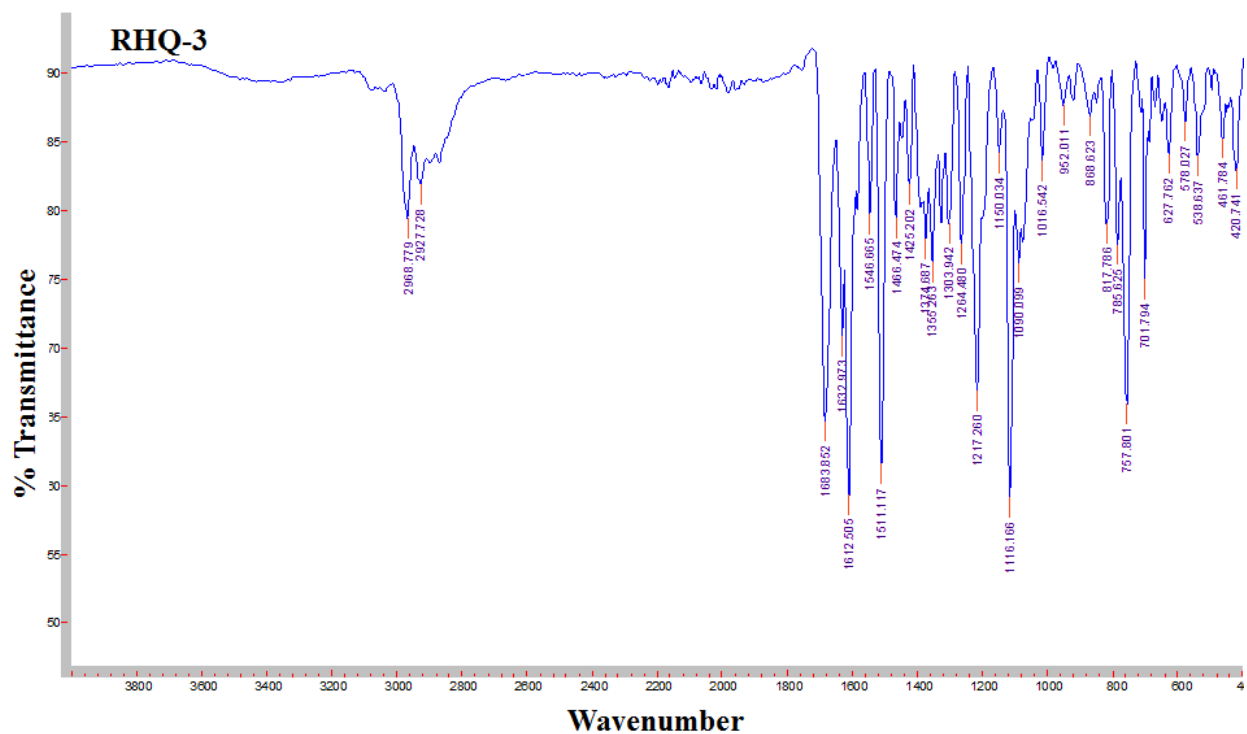

Fig. S11 IR spectrum of **RHQ-3**.

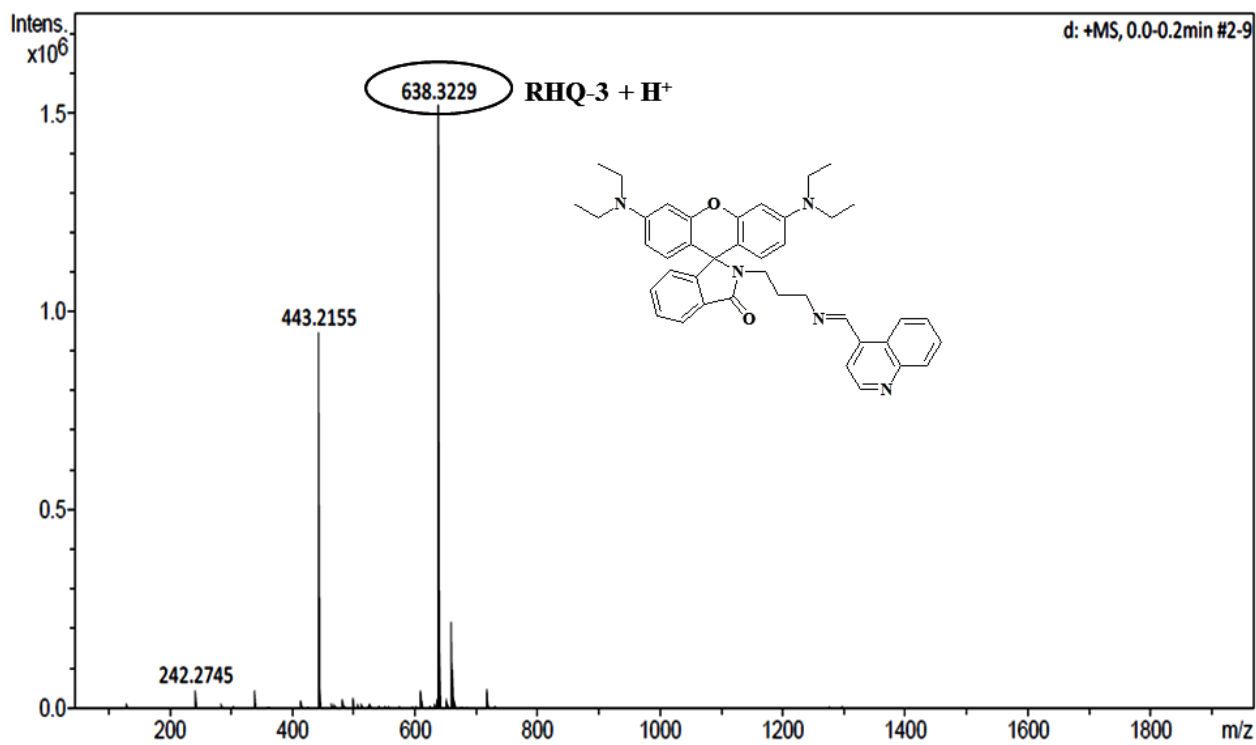

Fig. S12 Mass spectrum of **RHQ-3**.

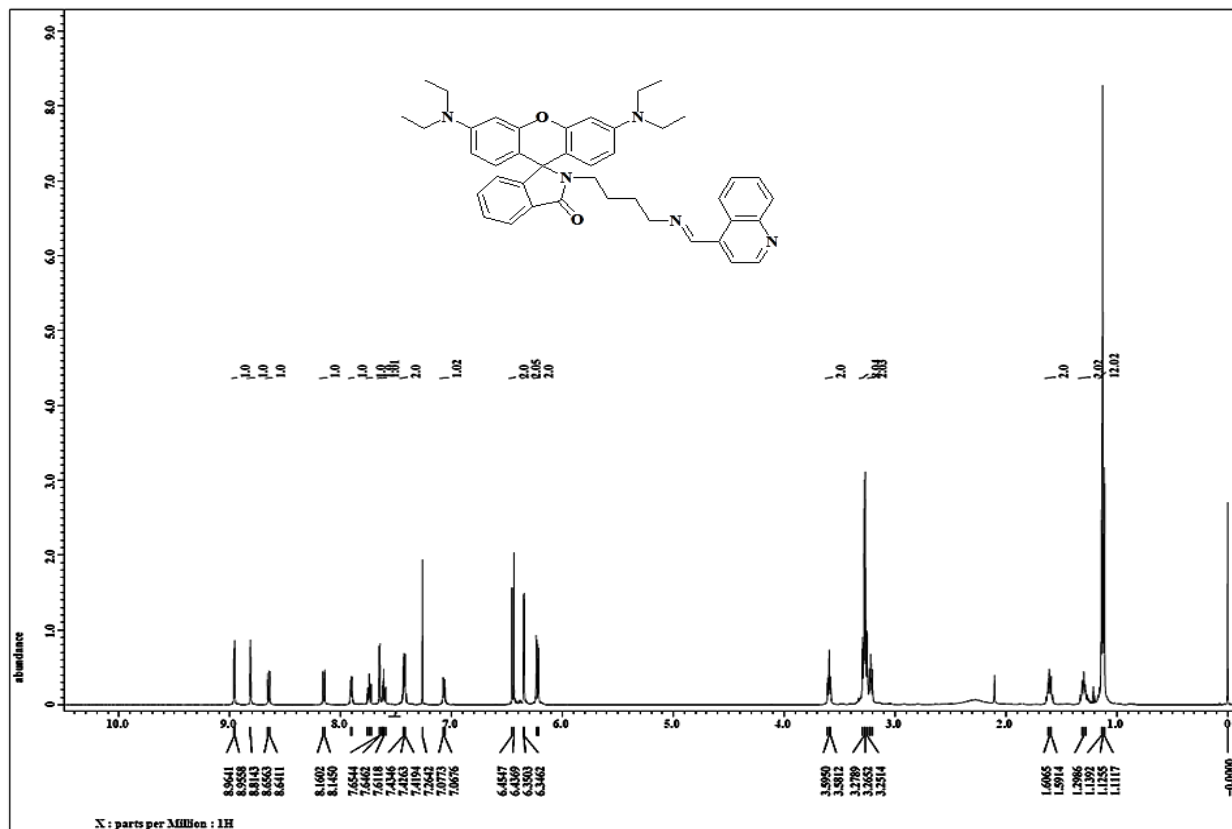

Fig. S13 <sup>1</sup>H NMR spectrum of RHQ-4.

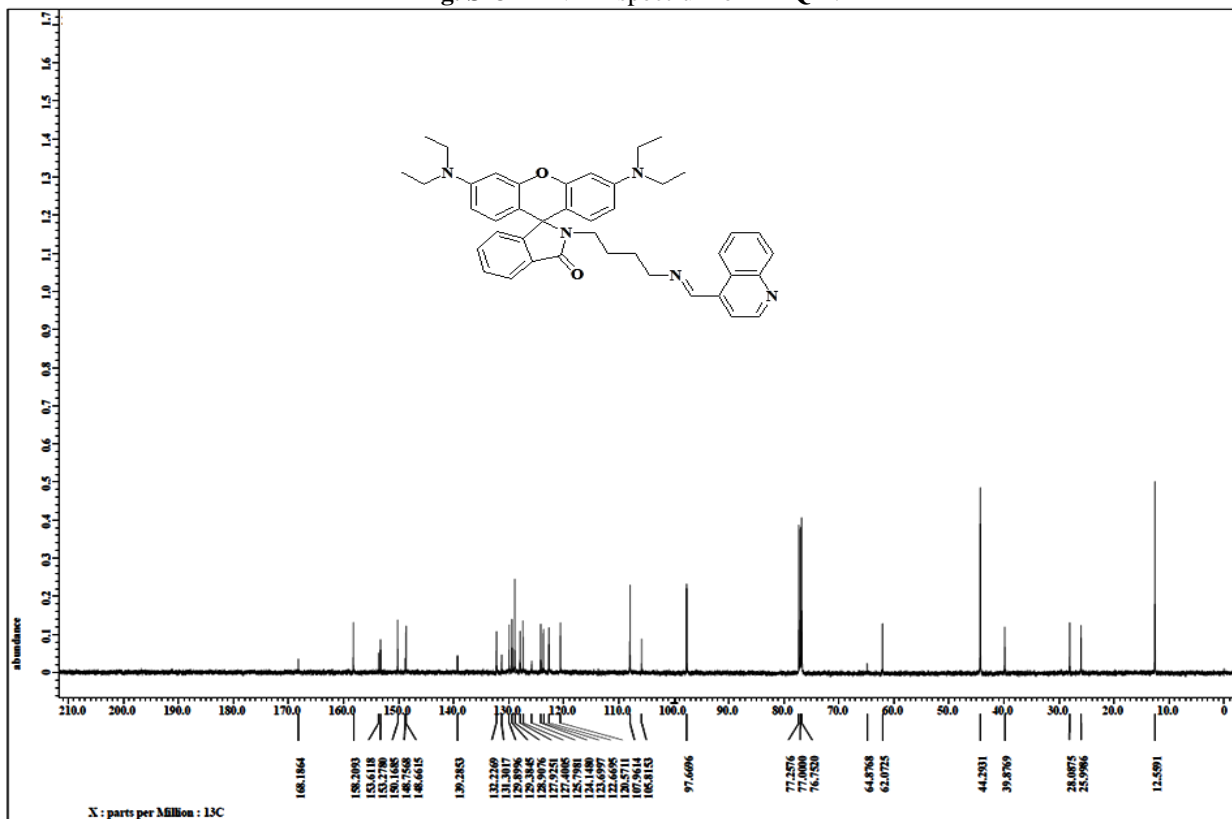

Fig. S14 <sup>13</sup>C NMR spectrum of RHQ-4.



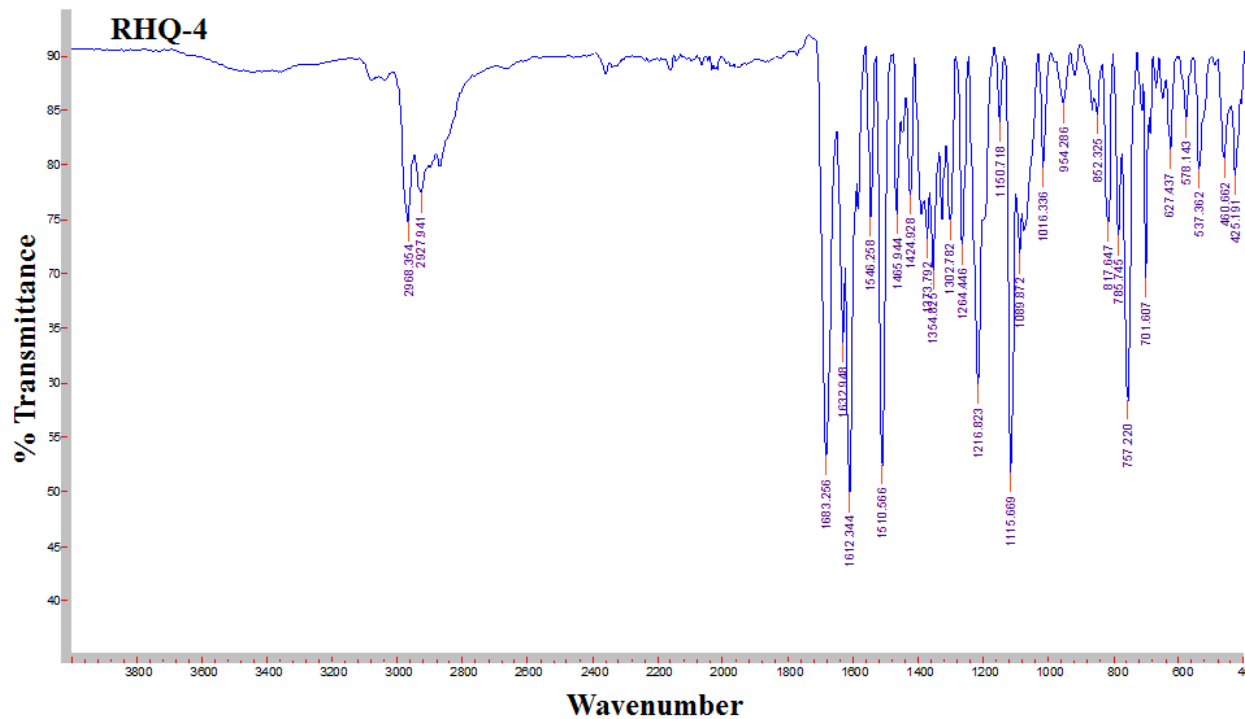

Fig. S15 IR spectrum of RHQ-4.

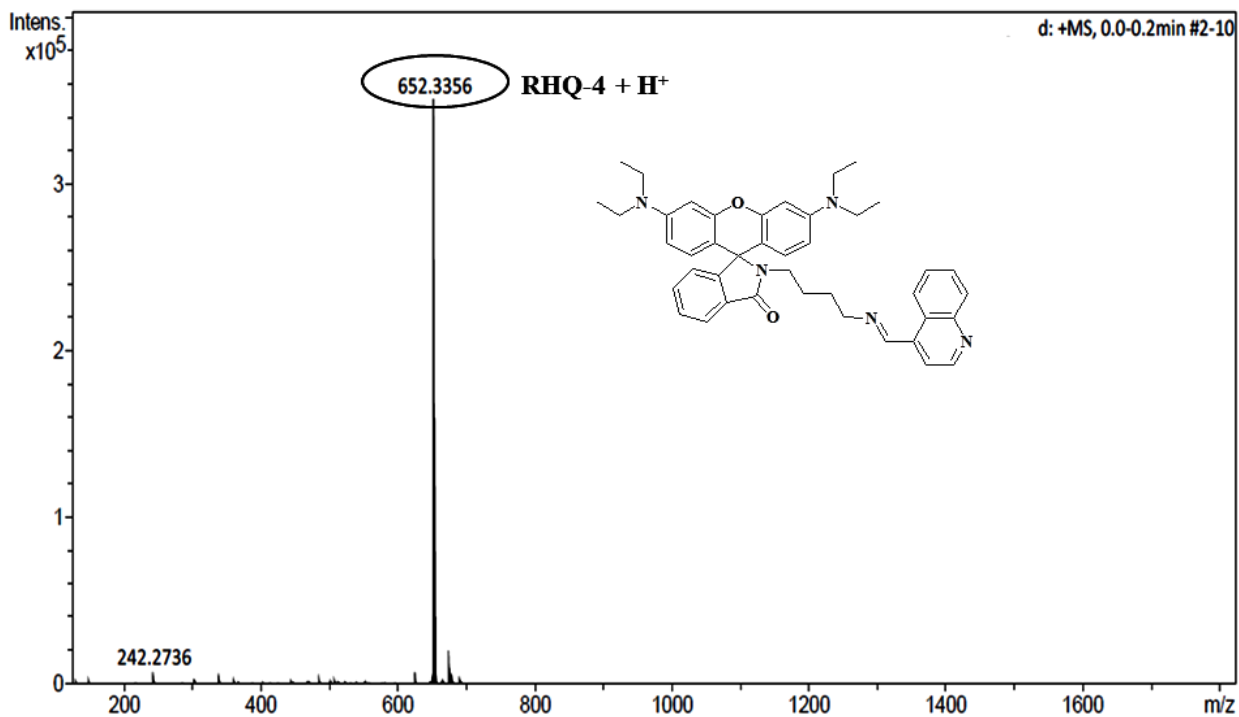

Fig. S16 Mass spectrum of RHQ-4.

## Fluorescence studies

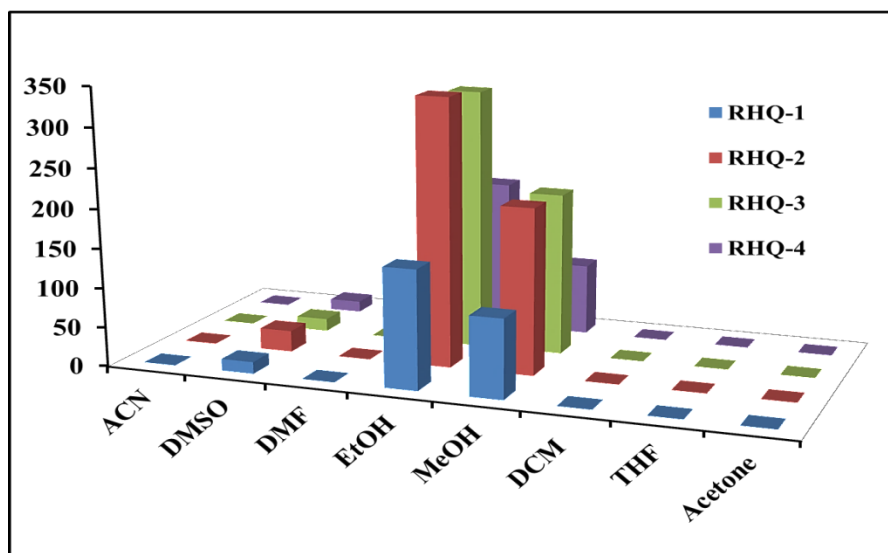

**Fig. S17** Fluorescence responses of **RHQs 1-4** ( $1 \times 10^{-5}$  M) in different solvents,  $\lambda_{\text{ex}} = 530$  nm.

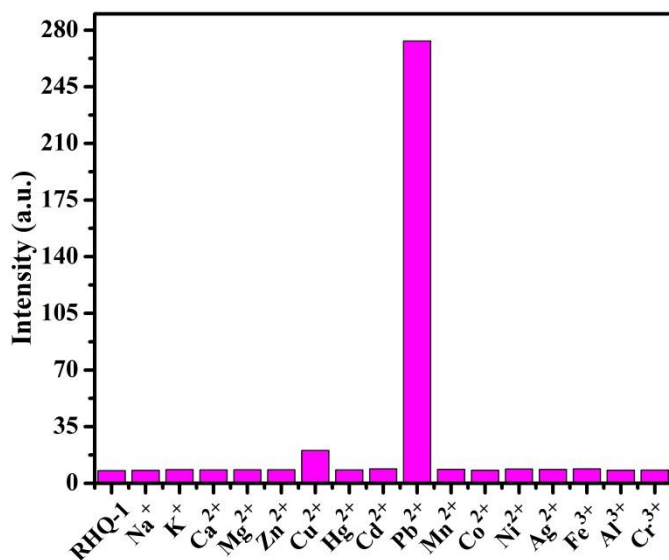

**Fig. S18** Comparison of the fluorescence intensity of **RHQ-1** ( $1 \times 10^{-5}$  M) upon addition of 0.061 equiv. of various metal ions in  $\text{CH}_3\text{CN}:\text{H}_2\text{O}$  (9.5:0.5 %, v/v).

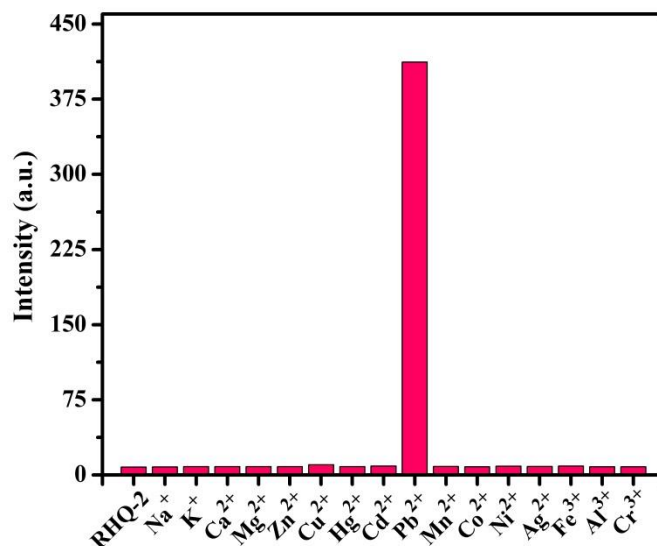

**Fig. S19** Comparison of the fluorescence intensity of **RHQ-2** ( $1 \times 10^{-5}$  M) upon addition of 0.043 equiv. of various metal ions in  $\text{CH}_3\text{CN}:\text{H}_2\text{O}$  (9.5:0.5 %, v/v).

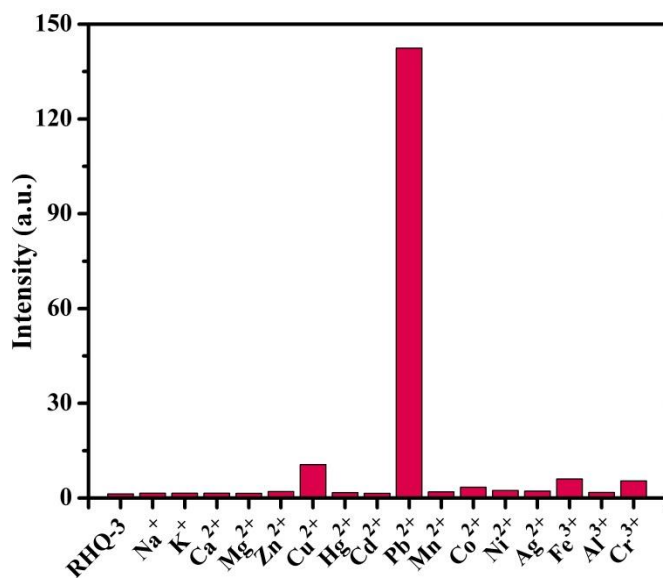

**Fig. S20** Comparison of the fluorescence intensity of **RHQ-3** ( $1 \times 10^{-5}$  M) upon addition of 0.020 equiv. of various metal ions in  $\text{CH}_3\text{CN}:\text{H}_2\text{O}$  (9.5:0.5 %, v/v).

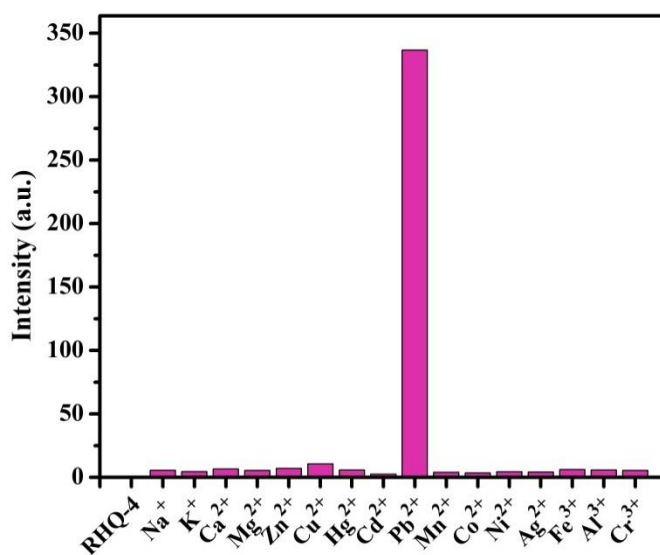

**Fig. S21** Comparison of the fluorescence intensity of **RHQ-4** ( $1 \times 10^{-5}$  M) upon addition of 3.04 equiv. of various metal ions in  $\text{CH}_3\text{CN}:\text{H}_2\text{O}$  (9.5:0.5 %, v/v).

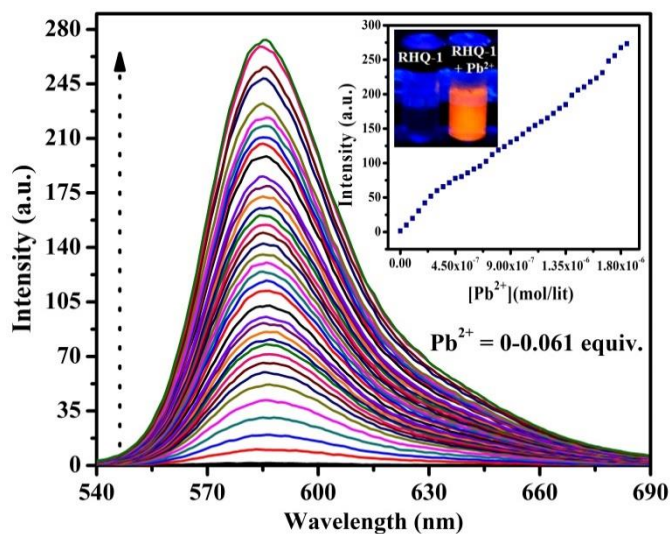

**Fig. S22** Fluorescence spectra of **RHQ-1** ( $1 \times 10^{-5}$  M) upon addition of 0.061 equiv. of  $\text{Pb}^{2+}$  in  $\text{CH}_3\text{CN}:\text{H}_2\text{O}$  (9.5:0.5 %, v/v).

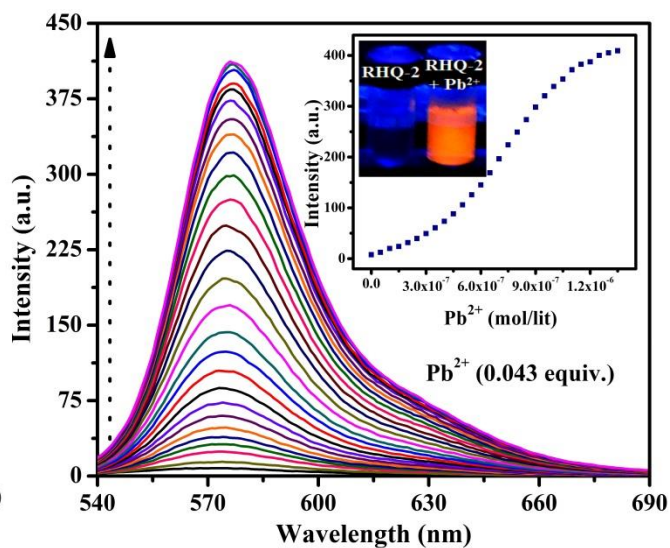

**Fig. S23** Fluorescence spectra of **RHQ-2** ( $1 \times 10^{-5}$  M) upon addition of 0.043 equiv. of  $\text{Pb}^{2+}$  in  $\text{CH}_3\text{CN}:\text{H}_2\text{O}$  (9.5:0.5 %, v/v).

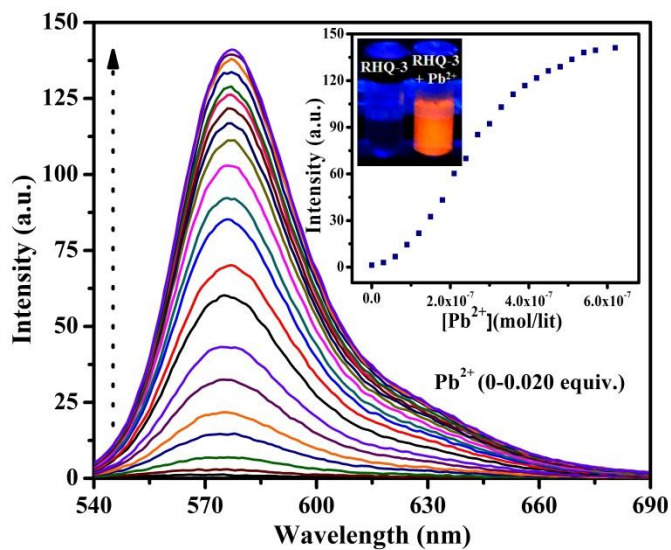

**Fig. S24** Fluorescence spectra of **RHQ-3** ( $1 \times 10^{-5}$  M) upon addition of 0.020 equiv. of  $\text{Pb}^{2+}$  in  $\text{CH}_3\text{CN}:\text{H}_2\text{O}$  (9.5:0.5 %, v/v).

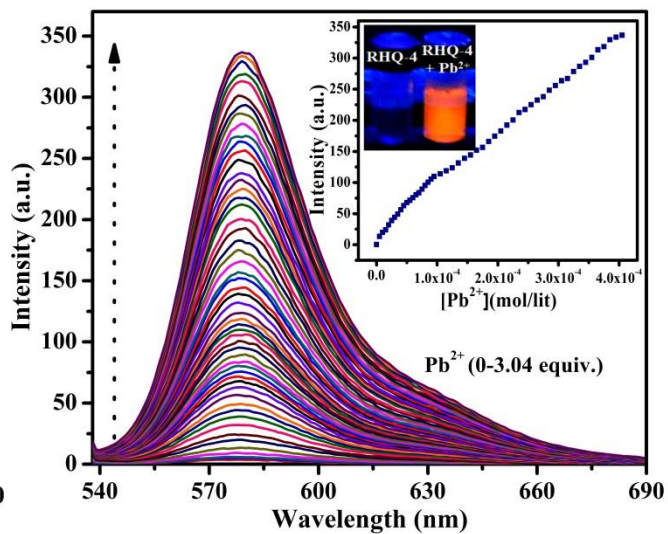

**Fig. S25** Fluorescence spectra of **RHQ-4** ( $1 \times 10^{-5}$  M) upon addition of 3.04 equiv. of  $\text{Pb}^{2+}$  in  $\text{CH}_3\text{CN}:\text{H}_2\text{O}$  (9.5:0.5 %, v/v).

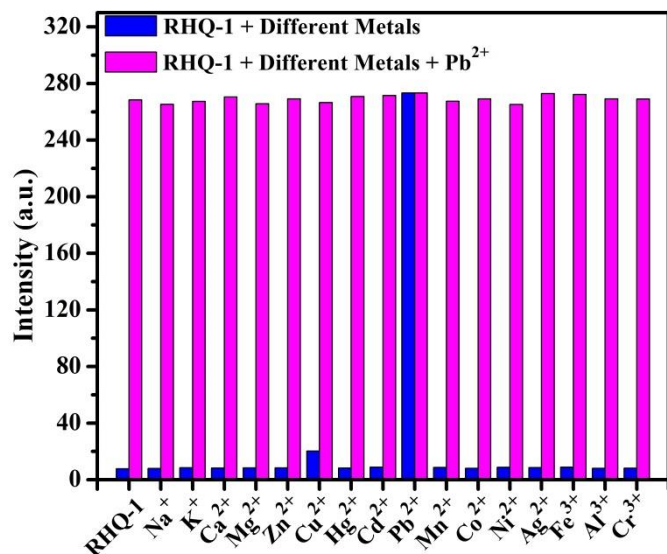

**Fig. S26** Fluorescence response of **RHQ-1** ( $1 \times 10^{-5}$  M) in  $\text{CH}_3\text{CN}:\text{H}_2\text{O}$  (9.5:0.5 %, v/v) upon addition of 0.061 equiv. of respective metal ions (blue bars), followed by addition of 0.061 equiv. of  $\text{Pb}^{2+}$  (pink bars).  $\lambda_{\text{ex}} = 530$  nm.

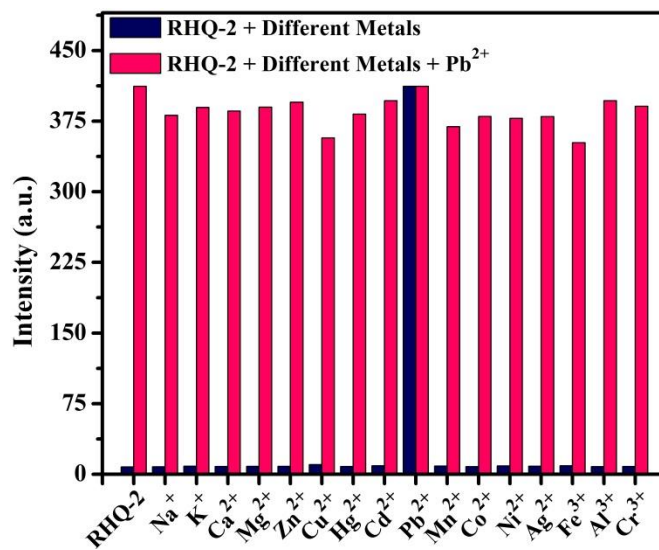

**Fig. S27** Fluorescence response of **RHQ-2** ( $1 \times 10^{-5}$  M) in  $\text{CH}_3\text{CN}:\text{H}_2\text{O}$  (9.5:0.5 %, v/v) upon addition of 0.043 equiv. of respective metal ions (blue bars), followed by addition of 0.043 equiv. of  $\text{Pb}^{2+}$  (pink bars).  $\lambda_{\text{ex}} = 530$  nm.

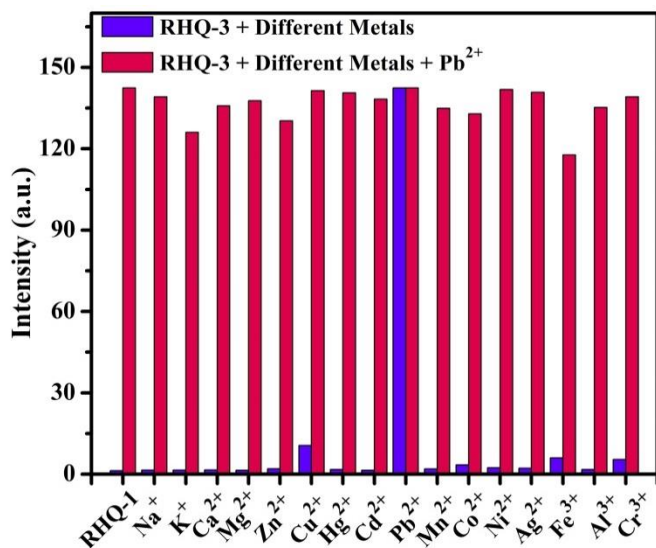

**Fig. S28** Fluorescence response of **RHQ-3** ( $1 \times 10^{-5}$  M) in  $\text{CH}_3\text{CN}:\text{H}_2\text{O}$  (9.5:0.5 %, v/v) upon addition of 0.020 equiv. of respective metal ions (blue bars), followed by addition of 0.020 equiv. of  $\text{Pb}^{2+}$  (pink bars).  $\lambda_{\text{ex}} = 530$  nm.

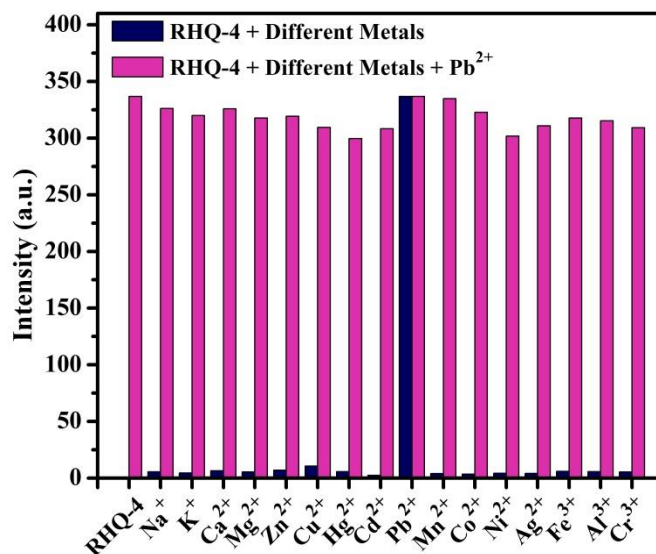

**Fig. S29** Fluorescence response of **RHQ-4** ( $1 \times 10^{-5}$  M) in  $\text{CH}_3\text{CN}:\text{H}_2\text{O}$  (9.5:0.5 %, v/v) upon addition of 3.04 equiv. of respective metal ions (blue bars), followed by addition of 3.04 equiv. of  $\text{Pb}^{2+}$  (pink bars).  $\lambda_{\text{ex}} = 530$  nm.

## Job's plots

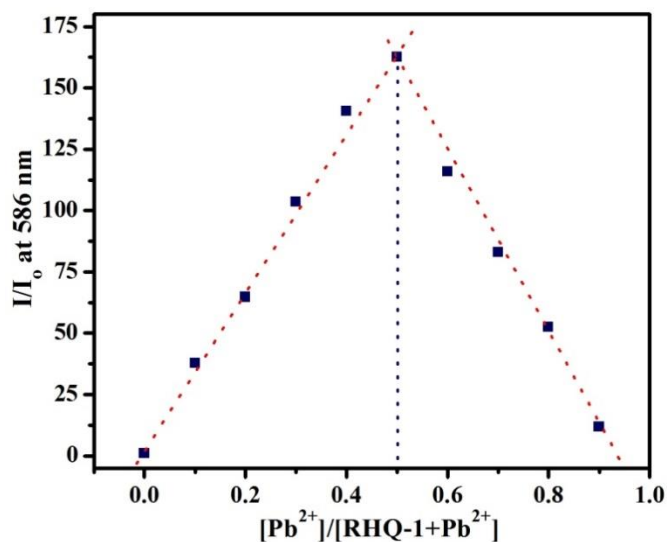

Fig. S30 Job's plot of **RHQ-1** ( $1 \times 10^{-5}$  M) towards the detection of  $Pb^{2+}$ .

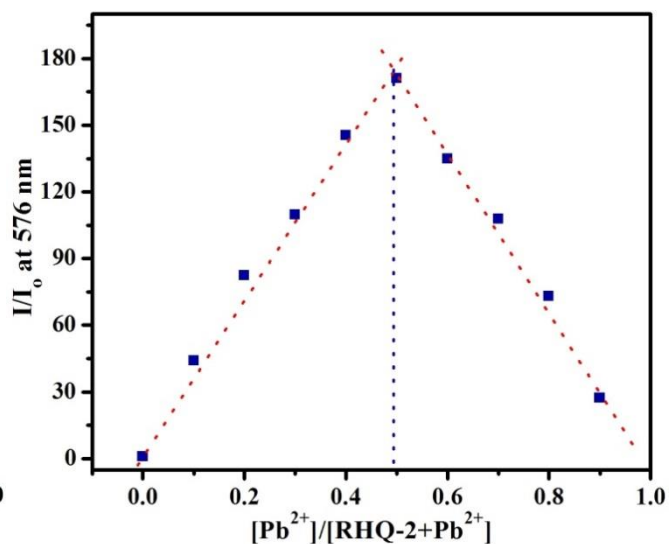

Fig. S31 Job's plot of **RHQ-2** ( $1 \times 10^{-5}$  M) towards the detection of  $Pb^{2+}$ .

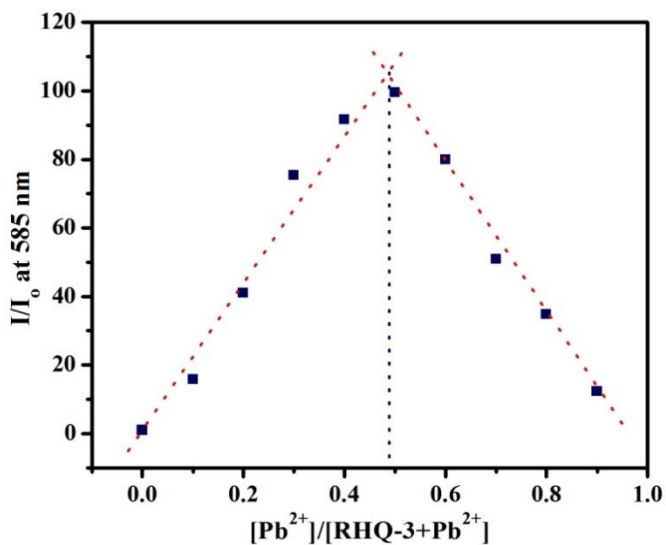

Fig. S32 Job's plot of **RHQ-3** ( $1 \times 10^{-5}$  M) towards the detection of  $Pb^{2+}$ .

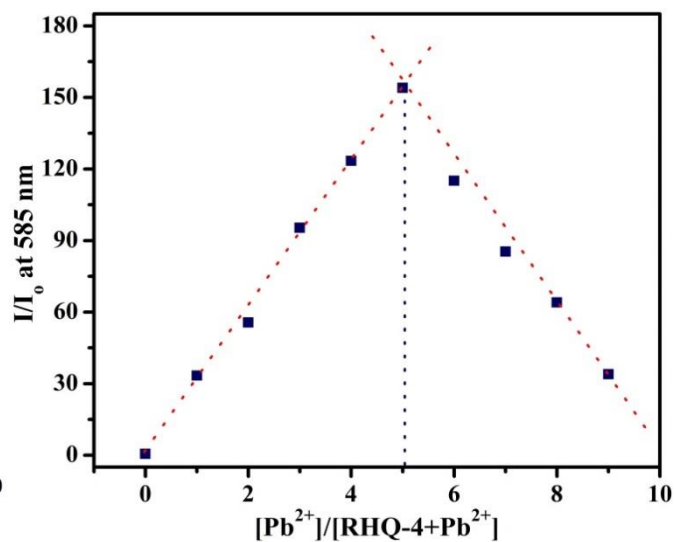

Fig. S33 Job's plot of **RHQ-4** ( $1 \times 10^{-5}$  M) towards the detection of  $Pb^{2+}$ .

## Binding constants

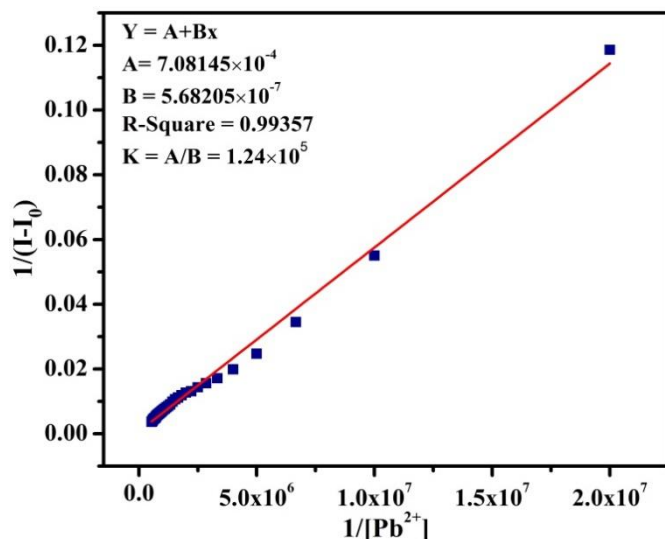

**Fig. S34** Binding constant of **RHQ-1** ( $1 \times 10^{-5}$  M) towards  $\text{Pb}^{2+}$ .

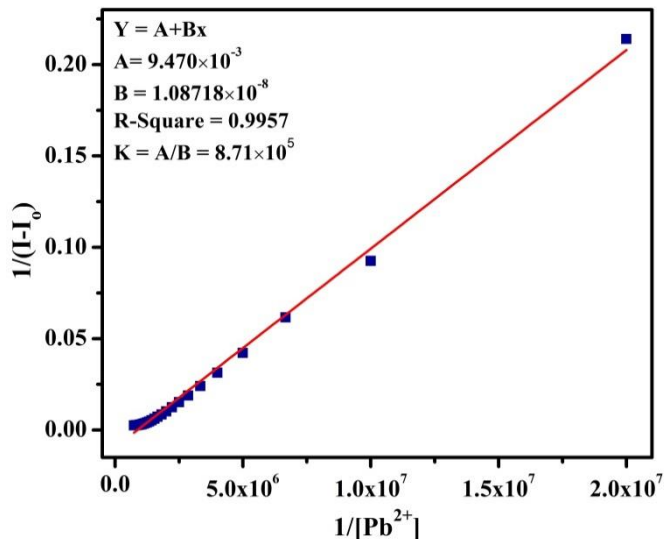

**Fig. S35** Binding constant of **RHQ-2** ( $1 \times 10^{-5}$  M) towards  $\text{Pb}^{2+}$ .

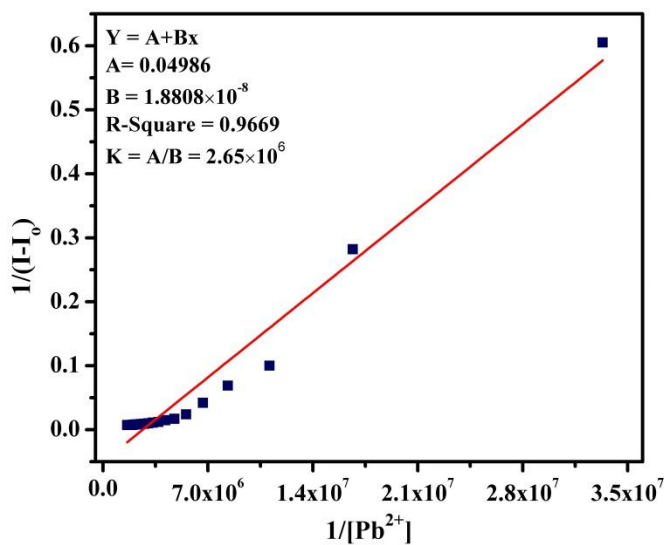

**Fig. S36** Binding constant of **RHQ-3** ( $1 \times 10^{-5}$  M) towards  $\text{Pb}^{2+}$ .

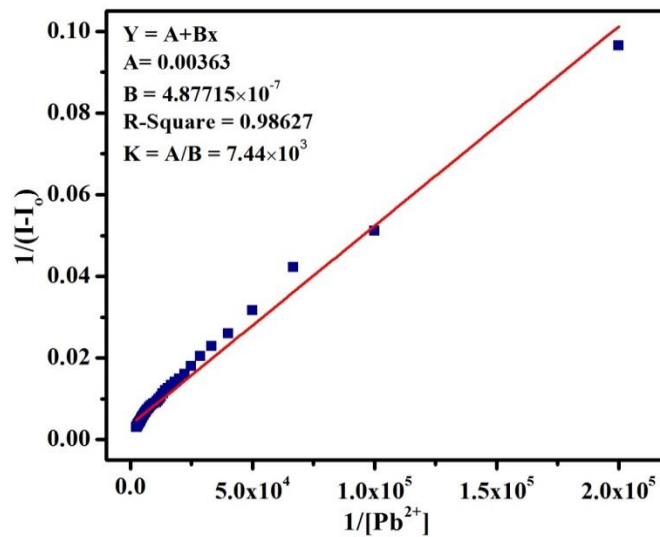

**Fig. S37** Binding constant of **RHQ-4** ( $1 \times 10^{-5}$  M) towards  $\text{Pb}^{2+}$ .

## Detection limits

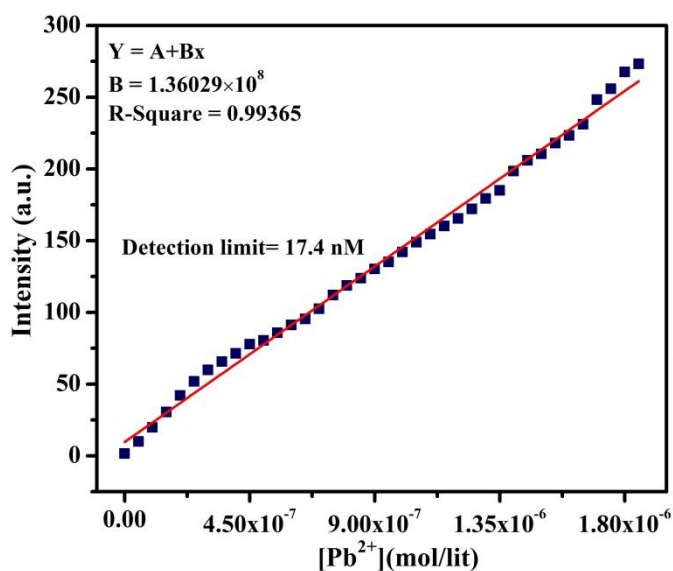

Fig. S38 Detection limit of RHQ-1 ( $1 \times 10^{-5}$  M) towards the detection of Pb<sup>2+</sup>.

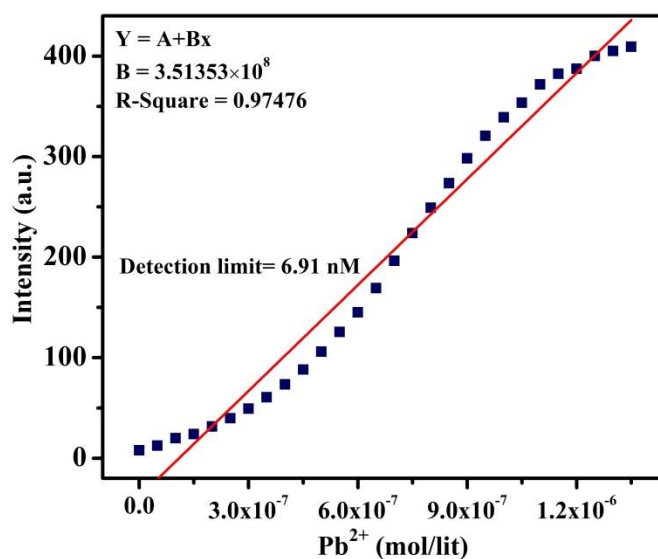

Fig. S39 Detection limit of RHQ-2 ( $1 \times 10^{-5}$  M) towards the detection of Pb<sup>2+</sup>.

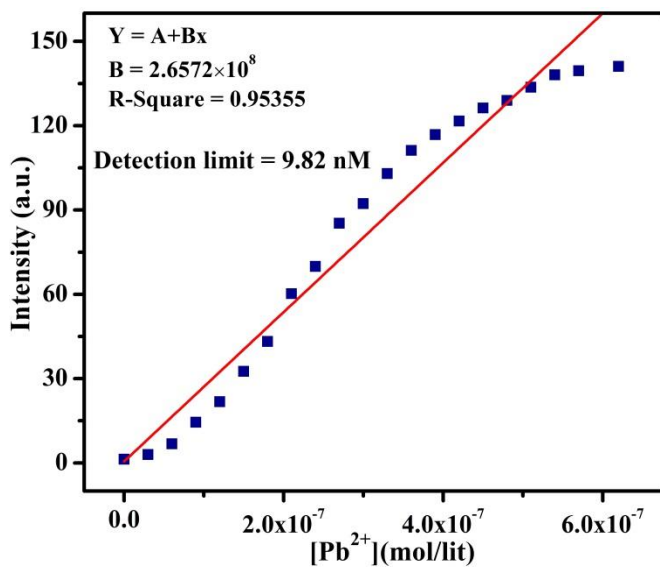

Fig. S40 Detection limit of RHQ-3 ( $1 \times 10^{-5}$  M) towards the detection of Pb<sup>2+</sup>.

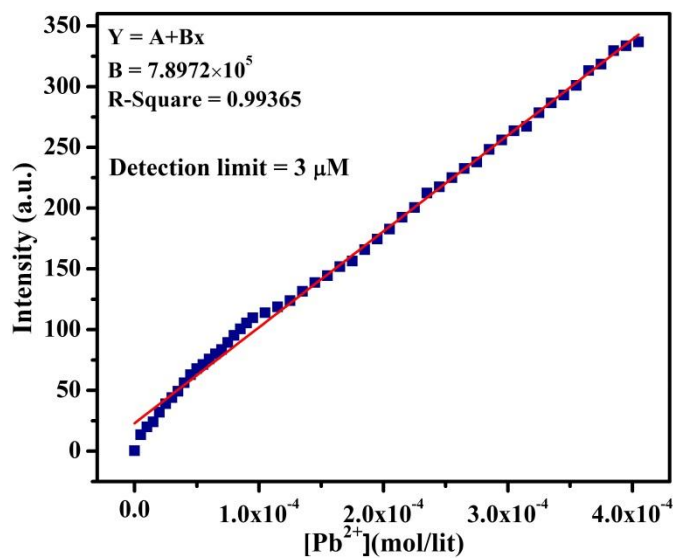

Fig. S41 Detection limit of RHQ-4 ( $1 \times 10^{-5}$  M) towards the detection of Pb<sup>2+</sup>.



## Comparison of detection limits

The detection limits of **RHQ-1, RHQ-2, RHQ-3 & RHQ-4** towards  $\text{Pb}^{2+}$  were determined from the following equation:

$$\text{DL} = 3 \cdot \text{SD} / \text{S}$$

Where SD is the standard deviation of the blank solution (**RHQ-1, RHQ-2, RHQ-3 & RHQ-4**, 10  $\mu\text{M}$ ) detected for 10 times; S is the slope of the calibration curve.

| S. No. | Standard Deviation | Slope                 | (3×Standard deviation)/Slope | Detection Limit |
|--------|--------------------|-----------------------|------------------------------|-----------------|
| 1.     | 0.71               | $1.36029 \times 10^8$ | $1.74 \times 10^{-8}$        | 17.4 nM         |
| 2.     | 0.81               | $3.51353 \times 10^8$ | $0.691 \times 10^{-8}$       | 6.91 nM         |
| 3.     | 0.87               | $2.6572 \times 10^8$  | $0.982 \times 10^{-8}$       | 9.82 nM         |
| 4.     | 0.79               | $7.8972 \times 10^5$  | $0.300 \times 10^{-5}$       | 3 $\mu\text{M}$ |

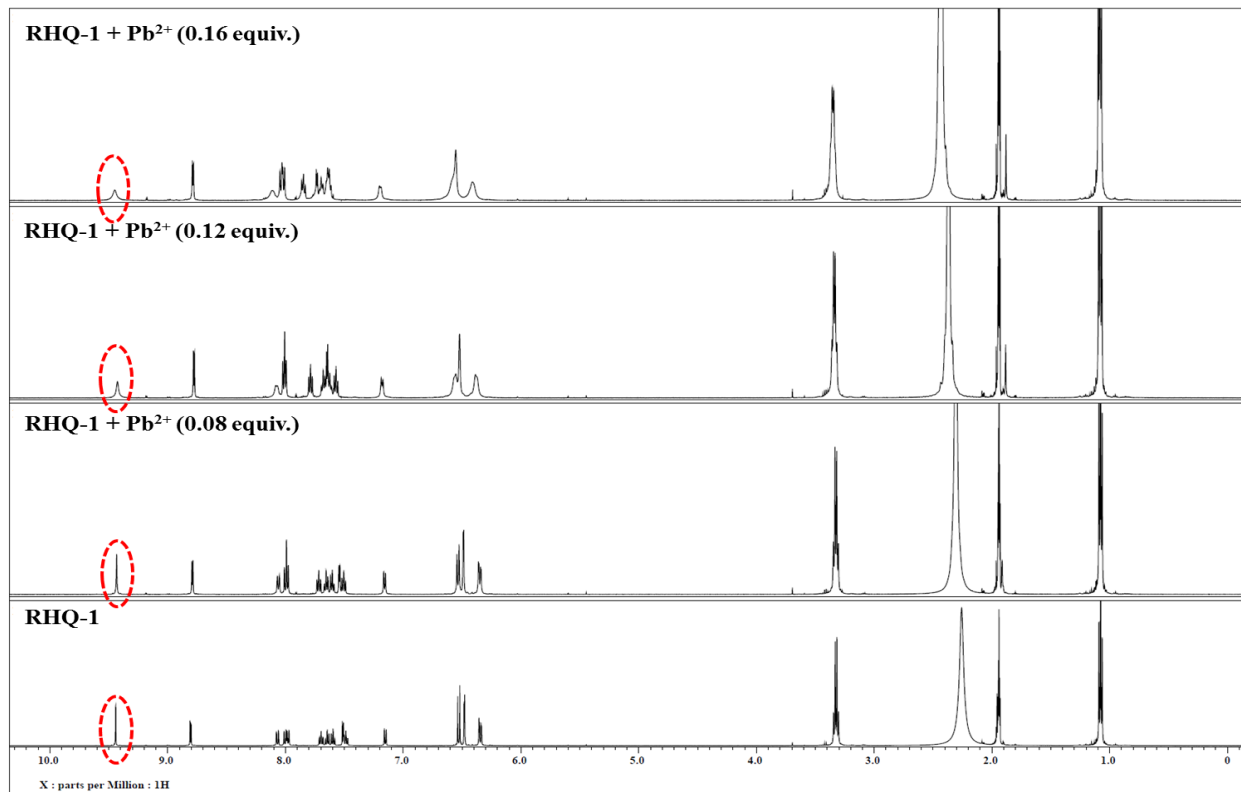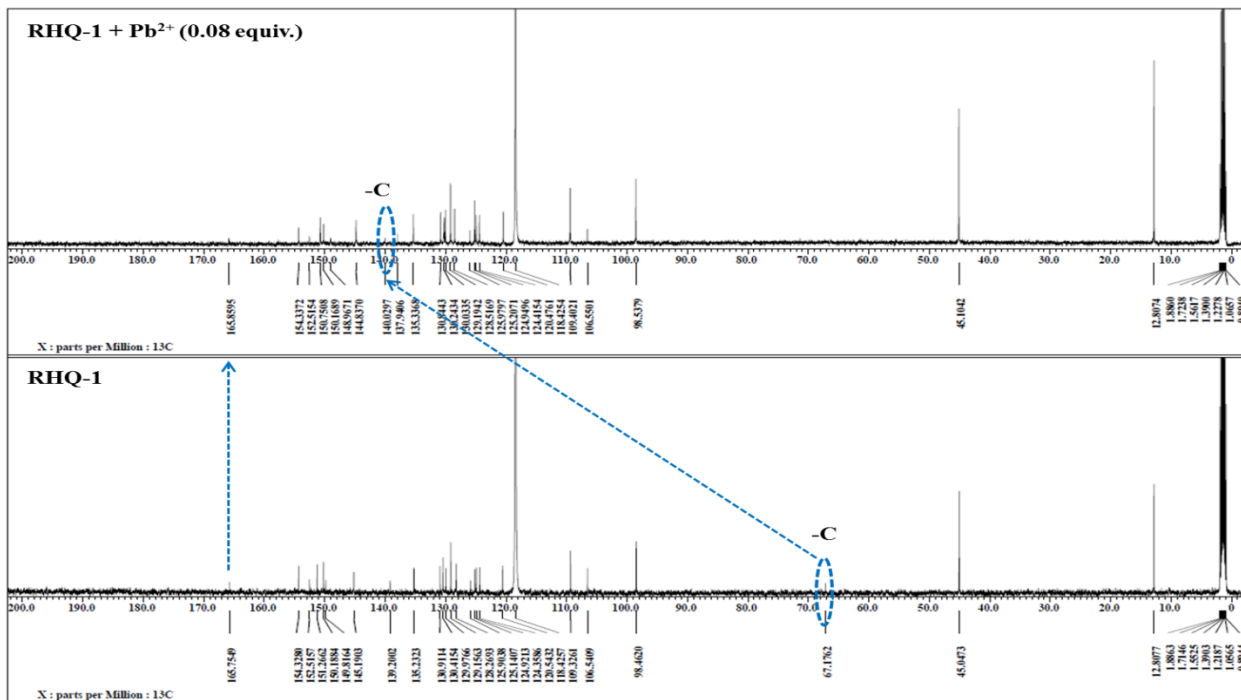

Fig. S42 <sup>1</sup>H NMR and <sup>13</sup>C NMR spectra of **RHQ-1** in CD<sub>3</sub>CN-d<sub>3</sub> after addition of Pb<sup>2+</sup>.

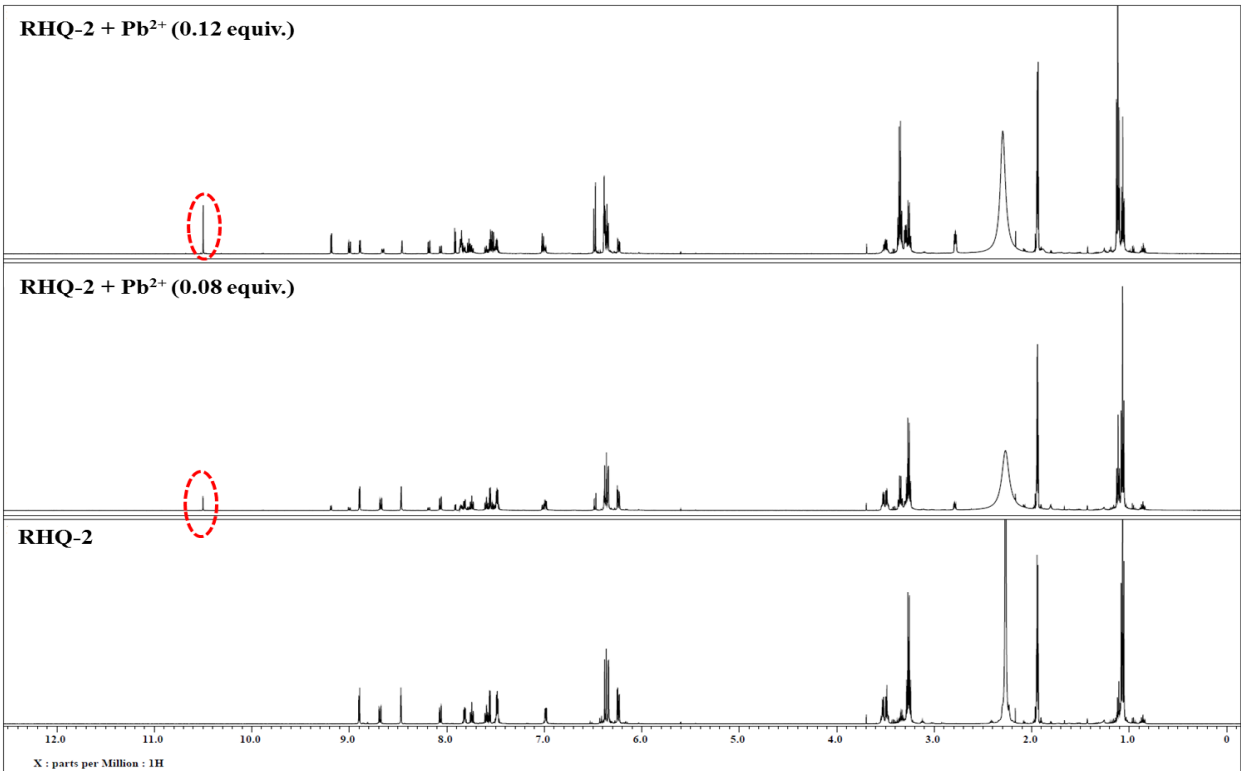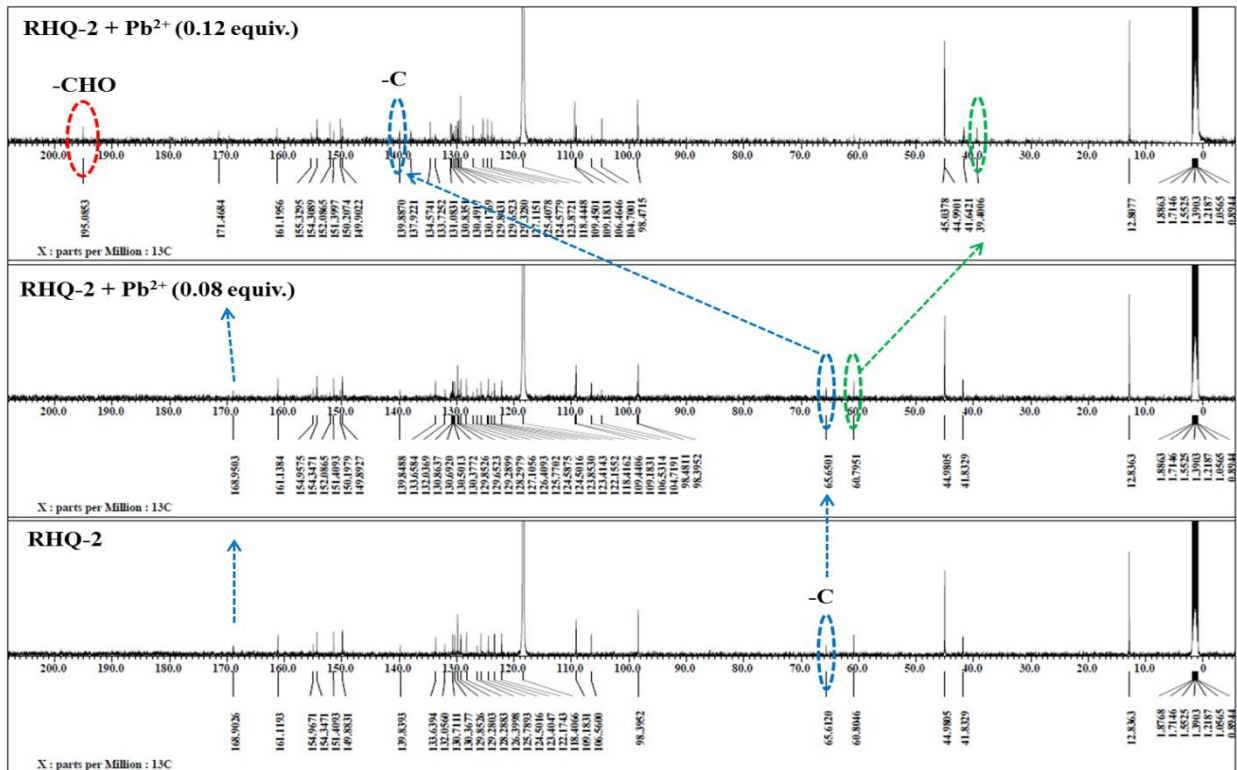

Fig. S43 <sup>1</sup>H NMR and <sup>13</sup>C NMR spectra of RHQ-2 in CD<sub>3</sub>CN-d<sub>3</sub> after addition of Pb<sup>2+</sup>.

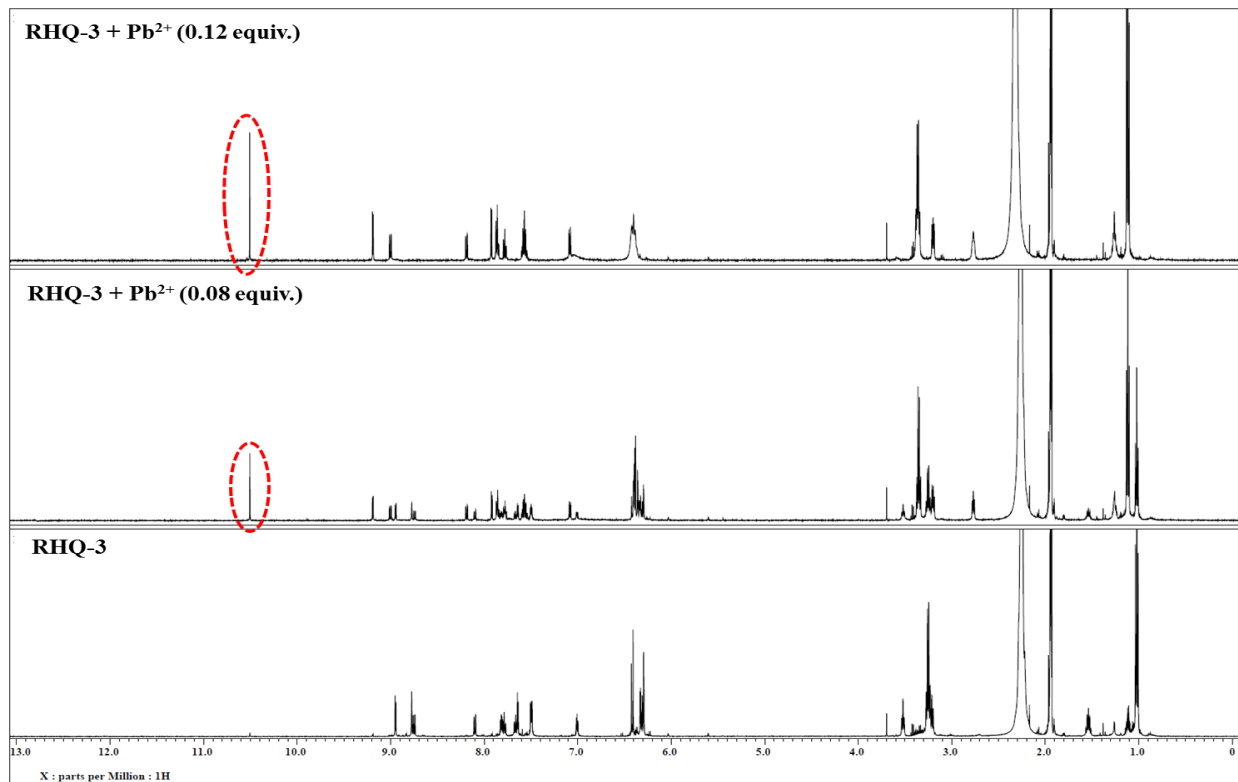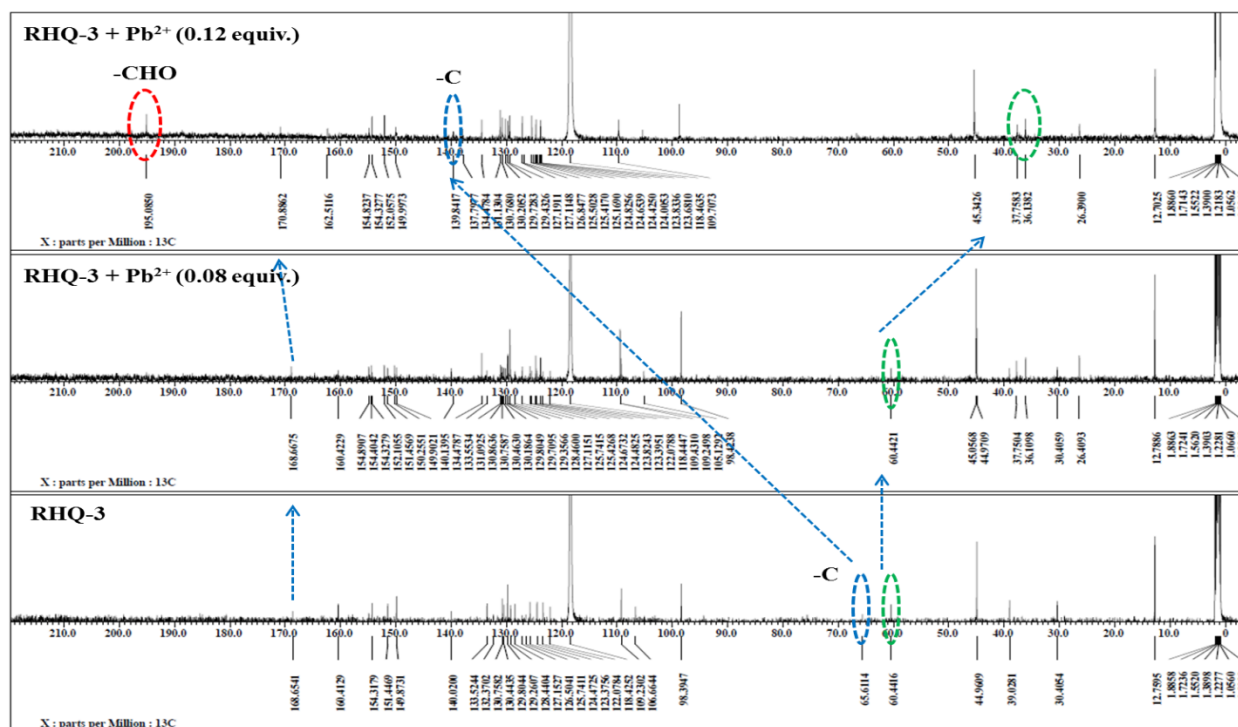

Fig. S44 <sup>1</sup>H NMR and <sup>13</sup>C NMR spectra of RHQ-3 in CD<sub>3</sub>CN-d<sub>3</sub> after addition of Pb<sup>2+</sup>.

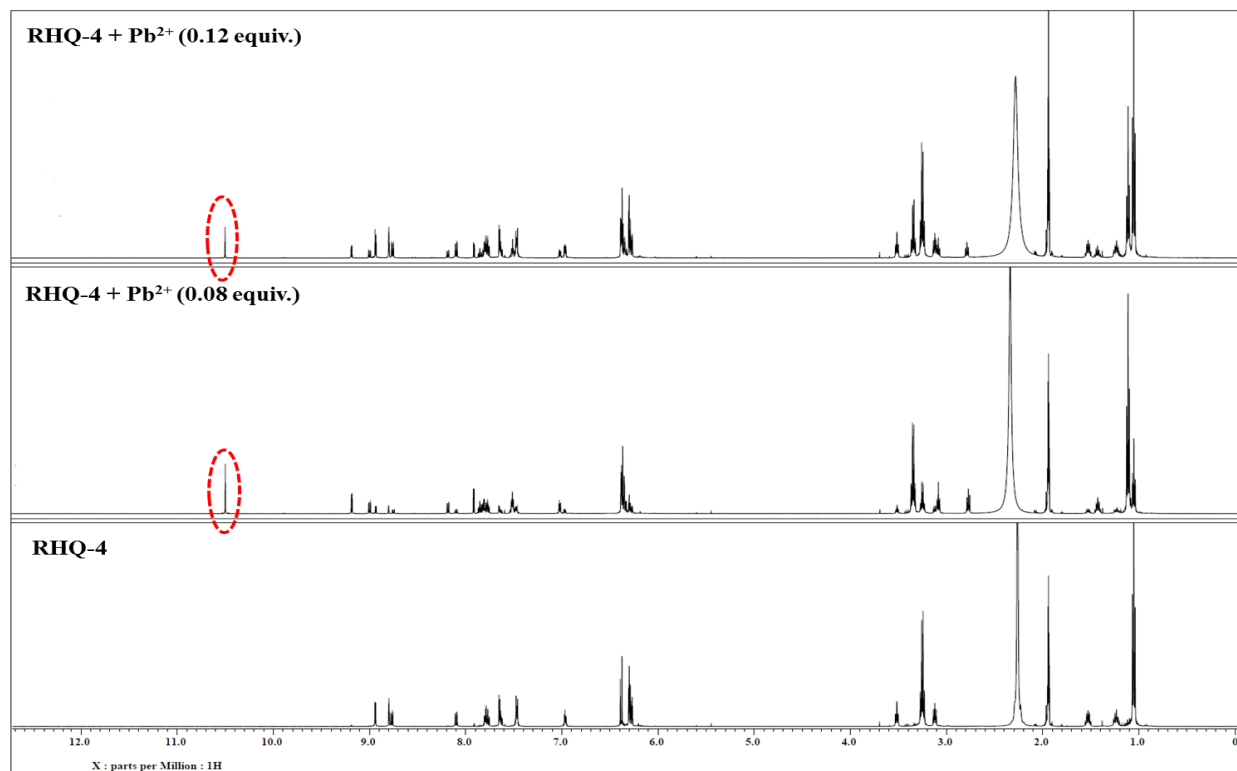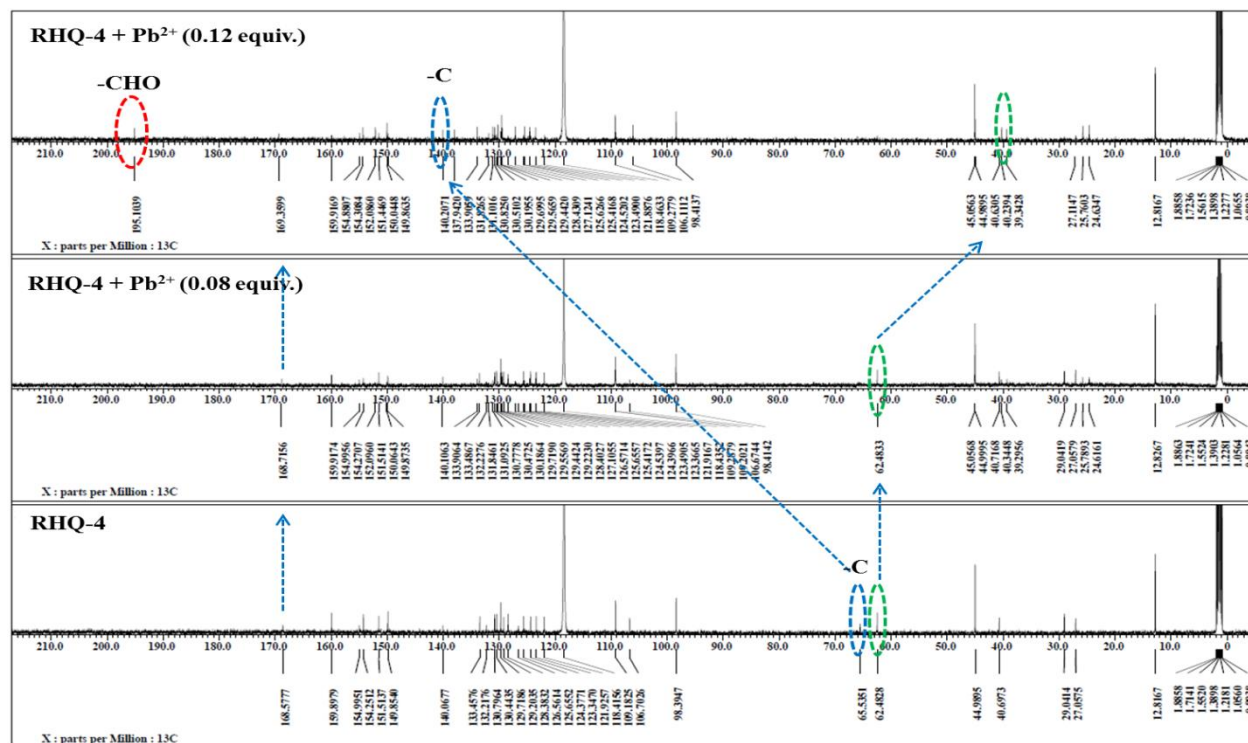

Fig. S45 <sup>1</sup>H NMR and <sup>13</sup>C NMR spectra of RHQ-4 in CD<sub>3</sub>CN-d<sub>3</sub> after addition of Pb<sup>2+</sup>.

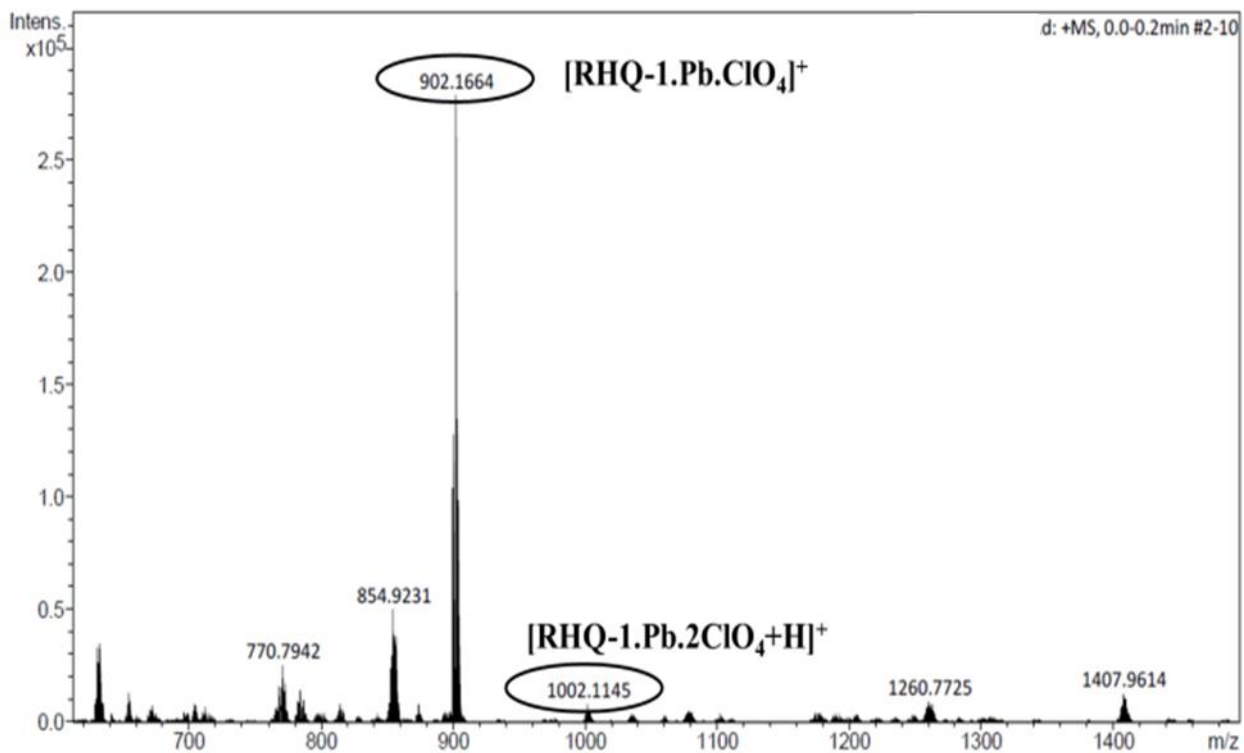

Fig. S46 Mass spectrum of RHQ-1 in presence of  $\text{Pb}^{2+}$ .

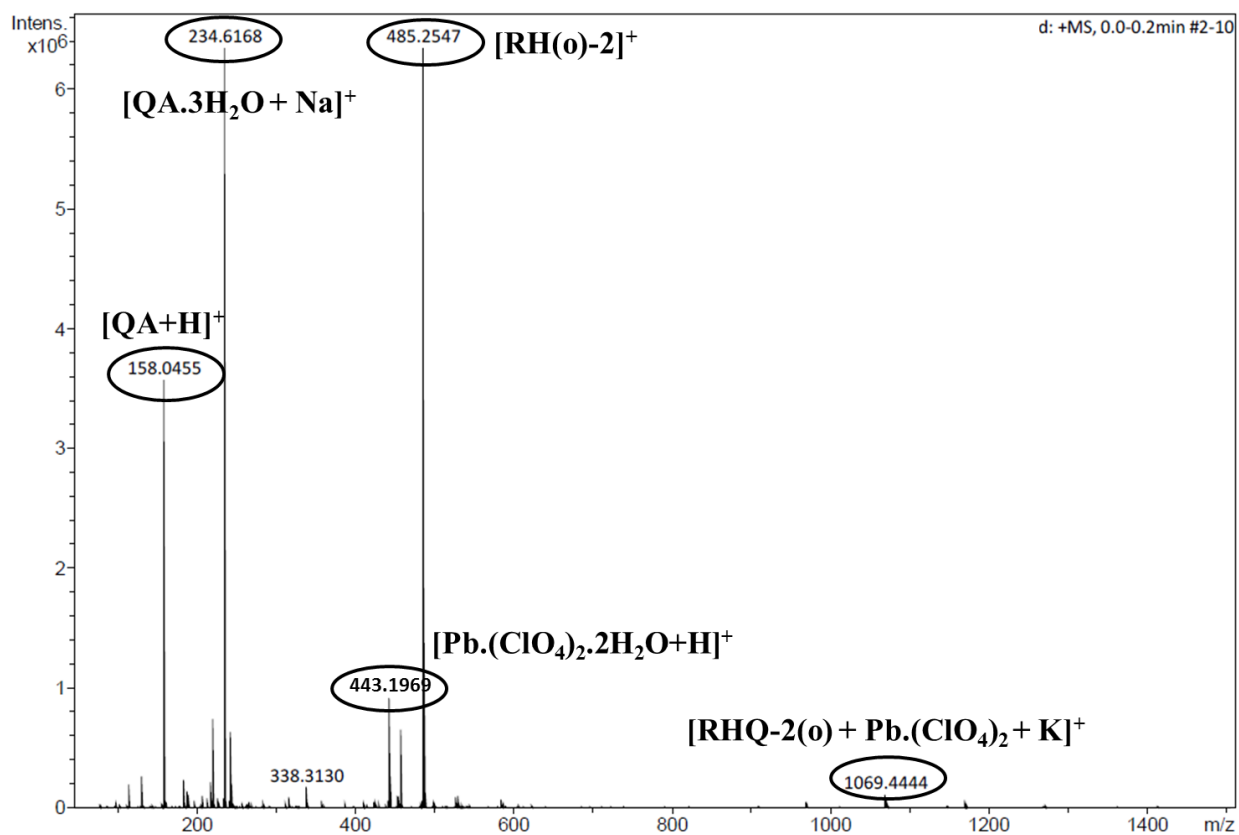

Fig. S47 Mass spectrum of RHQ-2 in presence of  $\text{Pb}^{2+}$ .

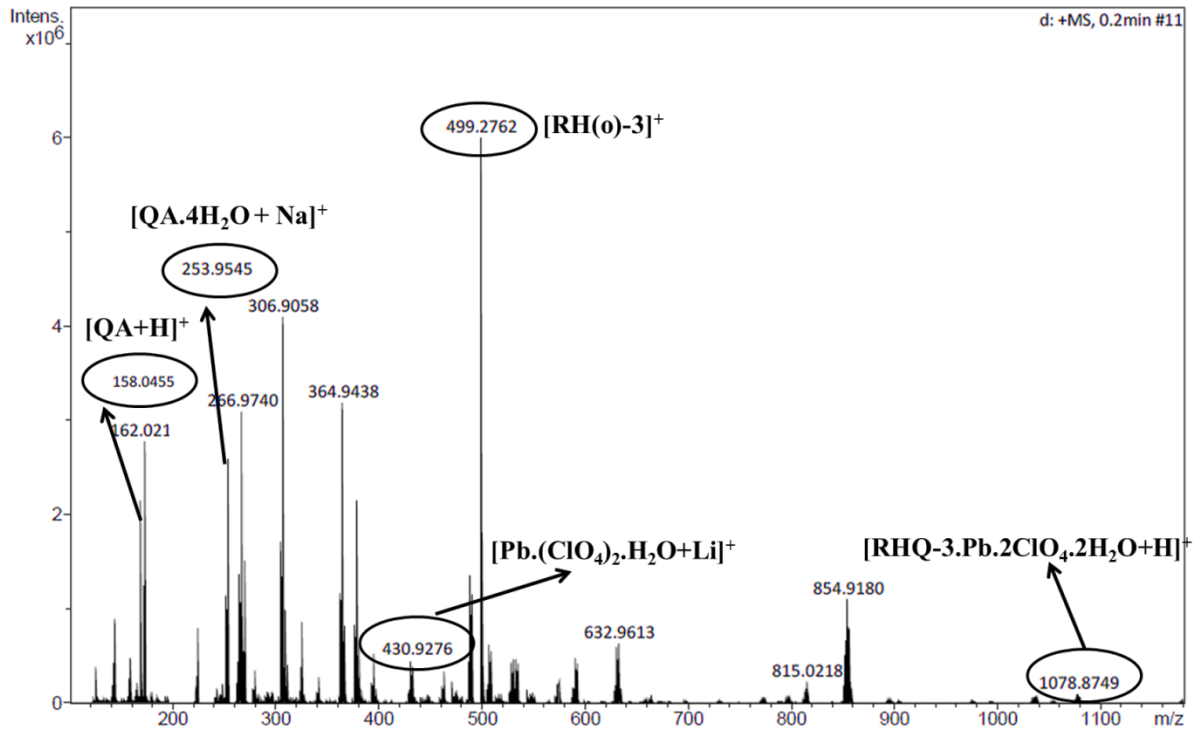

Fig. S48 Mass spectrum of RHQ-3 in presence of  $\text{Pb}^{2+}$ .

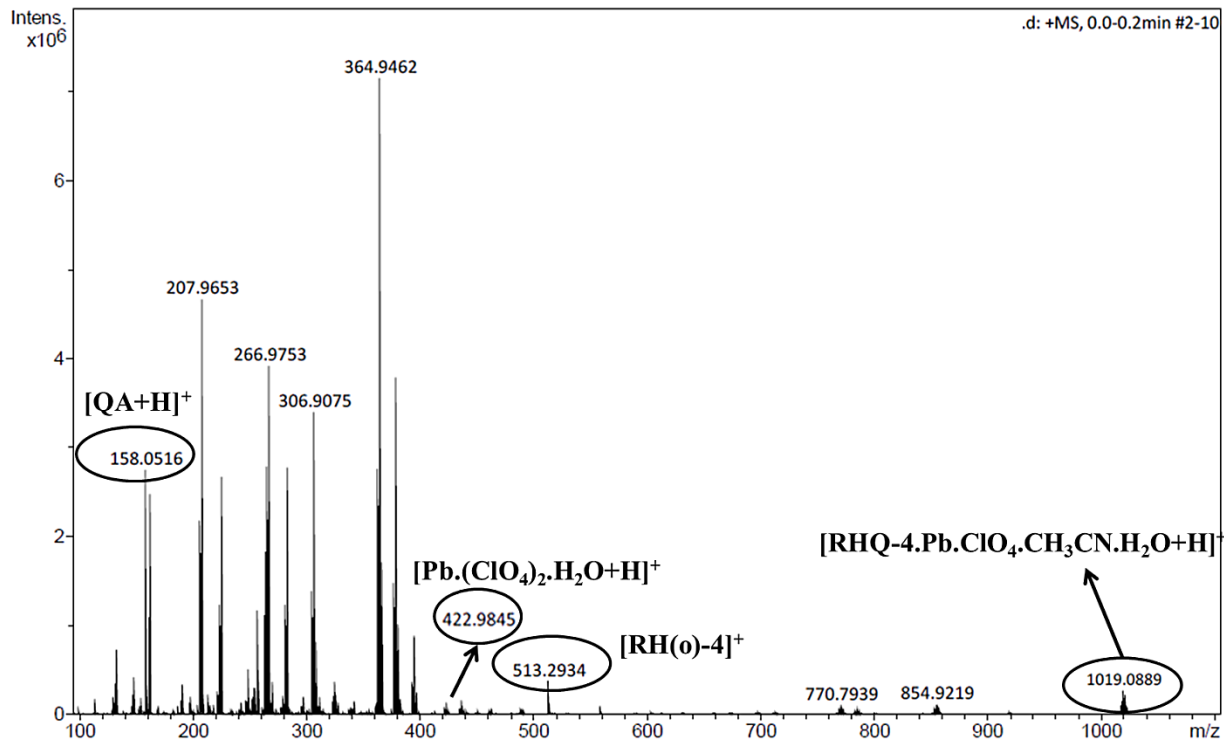

Fig. S49 Mass spectrum of RHQ-4 in presence of  $\text{Pb}^{2+}$ .

## Plausible mechanism of chemosensing

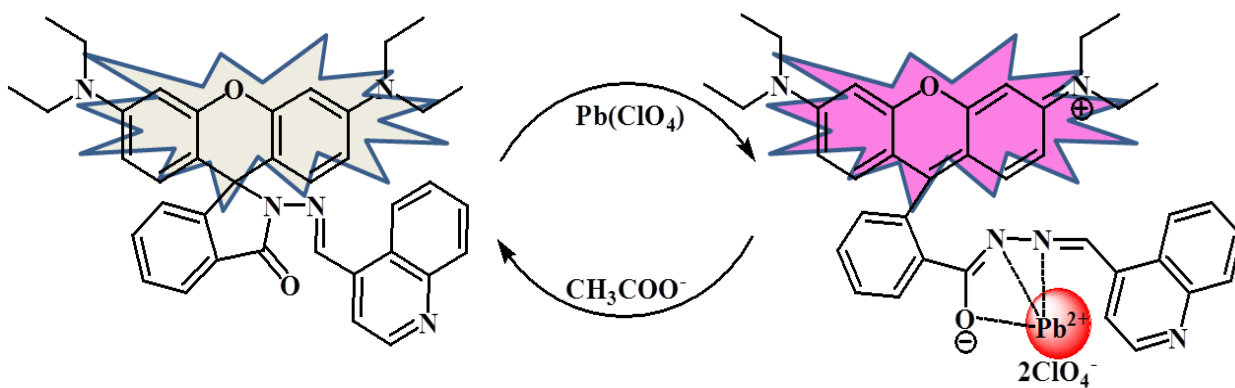

**Scheme 1** Plausible mechanism of  $\text{Pb}^{2+}$  binding with RHQ-1.



## Anion sensing

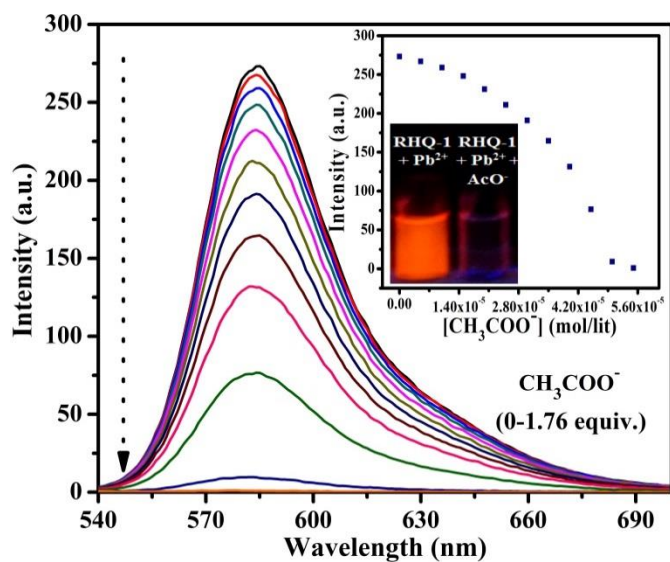

**Fig. S50** Fluorescence spectra of **RHQ-1+Pb<sup>2+</sup>** ensemble (1 × 10<sup>-5</sup> M) upon addition of 0.061 equiv. of CH<sub>3</sub>COO<sup>-</sup> in CH<sub>3</sub>CN:H<sub>2</sub>O (9.5:0.5 %, v/v).

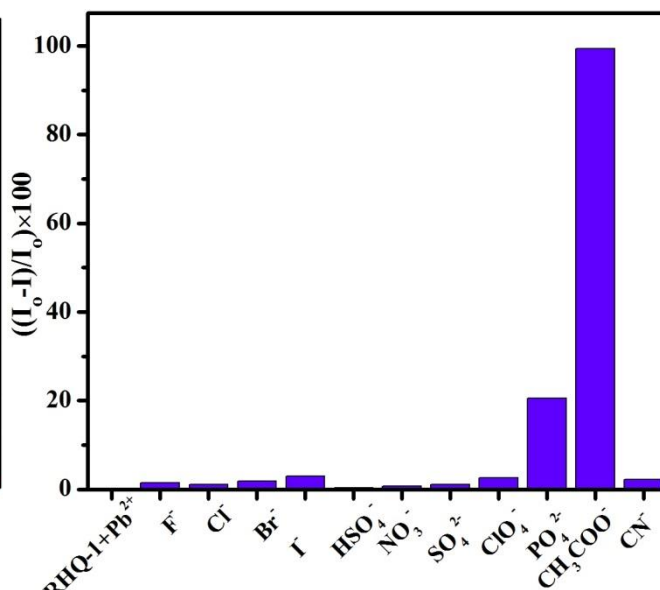

**Fig. S51** Comparison of fluorescence intensity at 586 nm of **RHQ-1+Pb<sup>2+</sup>** ensemble on addition of various anions.  $\lambda_{\text{ex}} = 530$  nm.

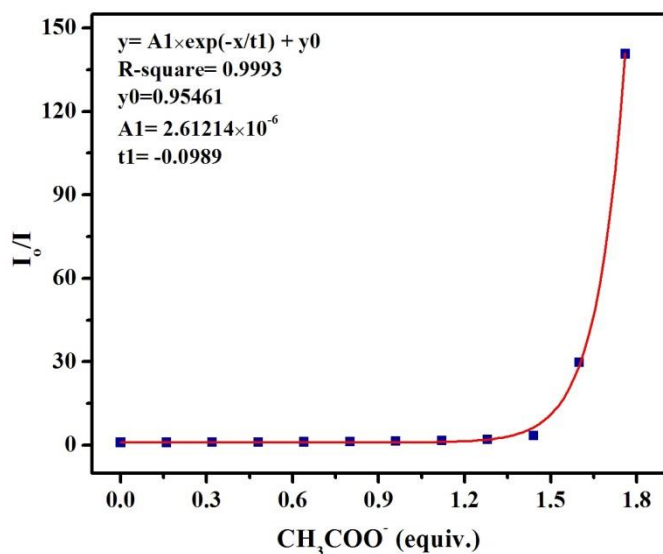

**Fig. S52** Stern-Volmer plot of **RHQ-1+Pb<sup>2+</sup>** ensemble on the addition of different amounts of CH<sub>3</sub>COO<sup>-</sup>.

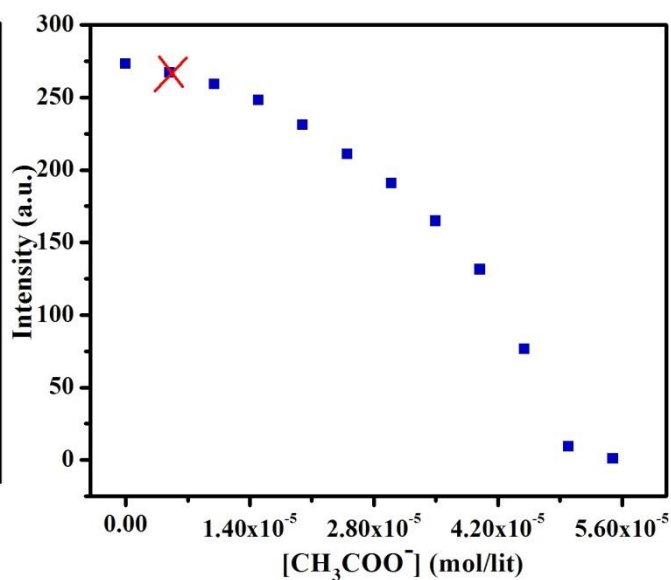

**Fig. S53** Detection limit of **RHQ-1+Pb<sup>2+</sup>** ensemble for the detection of CH<sub>3</sub>COO<sup>-</sup>.

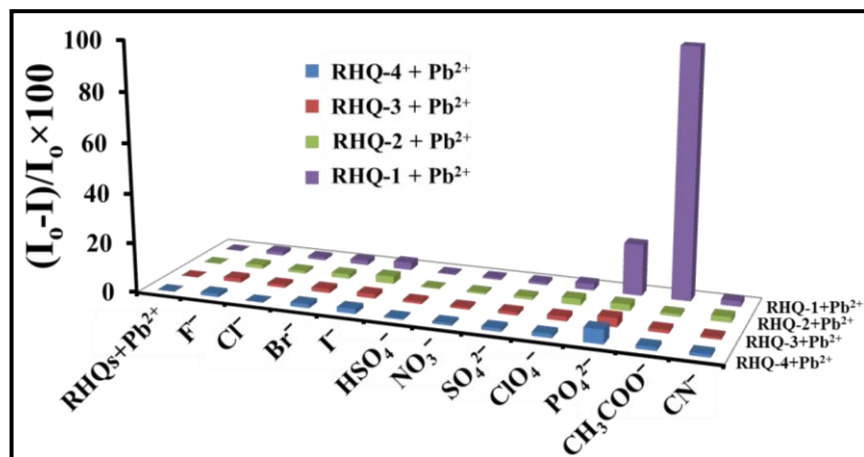

**Fig. S54** Comparison of fluorescence intensity at 586 nm of **RHQs+Pb<sup>2+</sup>** ensemble on addition of various anions,  $\lambda_{\text{ex}} = 530$  nm.

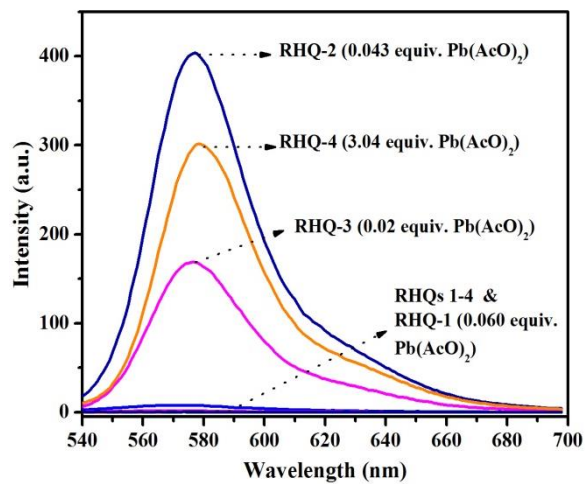

**Fig. S55** Fluorescence spectra of **RHQs 1-4** ( $1 \times 10^{-5}$  M) upon addition of 0.060, 0.043, 0.020 and 3.04 equiv. of  $\text{Pb}(\text{CH}_3\text{COO})_2$  in  $\text{CH}_3\text{CN}:\text{H}_2\text{O}$  (9.5:0.5 %, v/v) respectively.

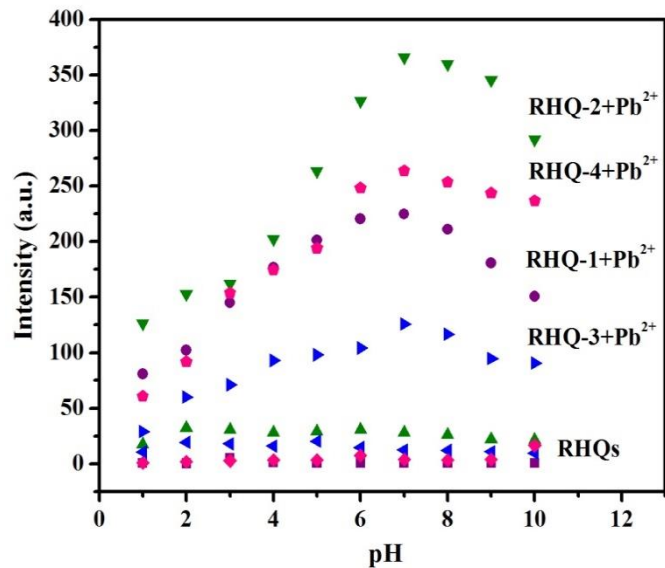

**Fig. S56** Effect of pH on fluorescence intensity of **RHQs 1-4** ( $1 \times 10^{-5} \text{M}$ ) and **RHQs 1-4+Pb<sup>2+</sup>** in Tris-HCl buffered (0.05M) solution.

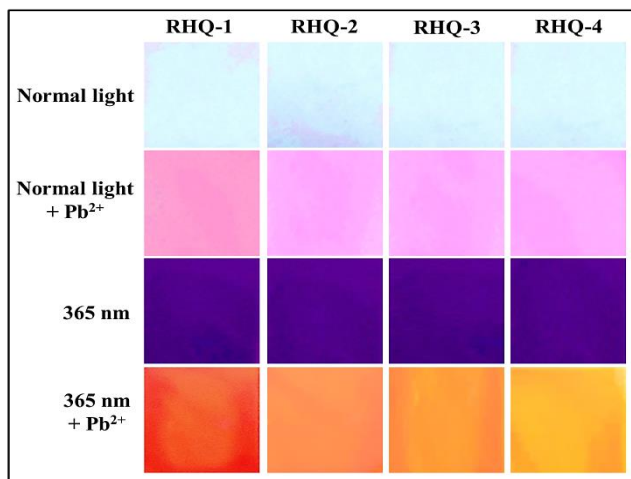

**Fig. S57** (upper two rows): under normal light; (lower two rows) under UV light (365 nm). Test strips coated with **RHQs** viewed under normal light and 365 nm in absence and presence of **Pb<sup>2+</sup>**.

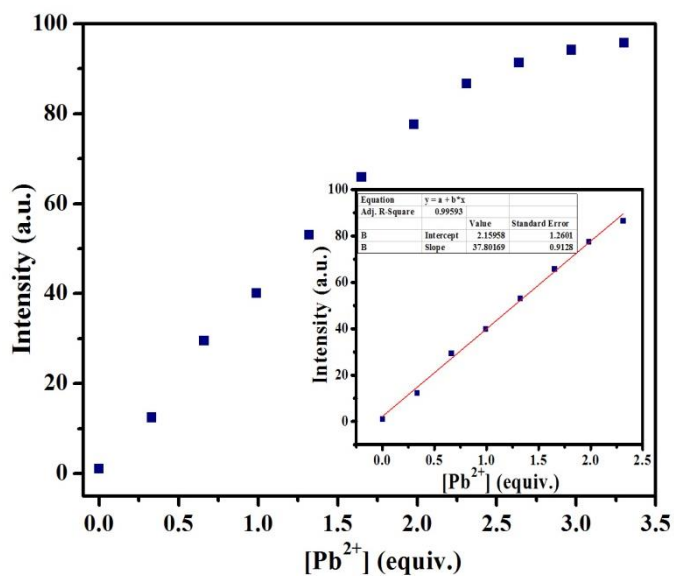

Fig. S58 Detection limit of **RHQ-1** ( $1 \times 10^{-5}$  M) towards the detection of  $Pb^{2+}$  in tap water.

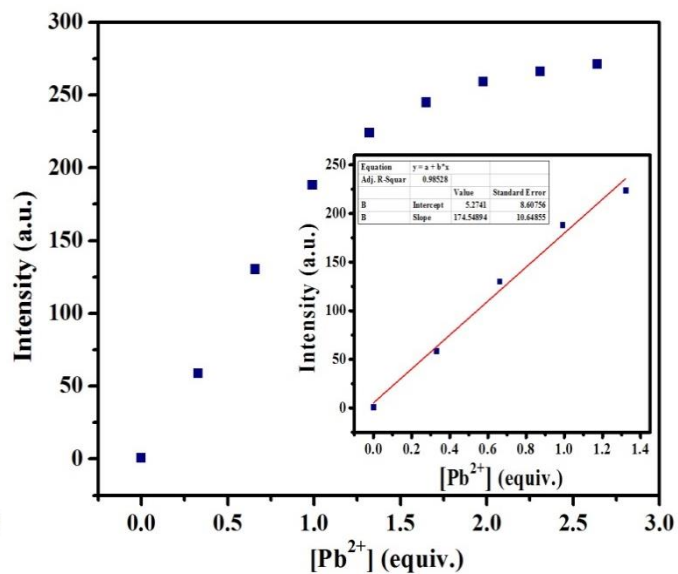

Fig. S59 Detection limit of **RHQ-2** ( $1 \times 10^{-5}$  M) towards the detection of  $Pb^{2+}$  in tap water.

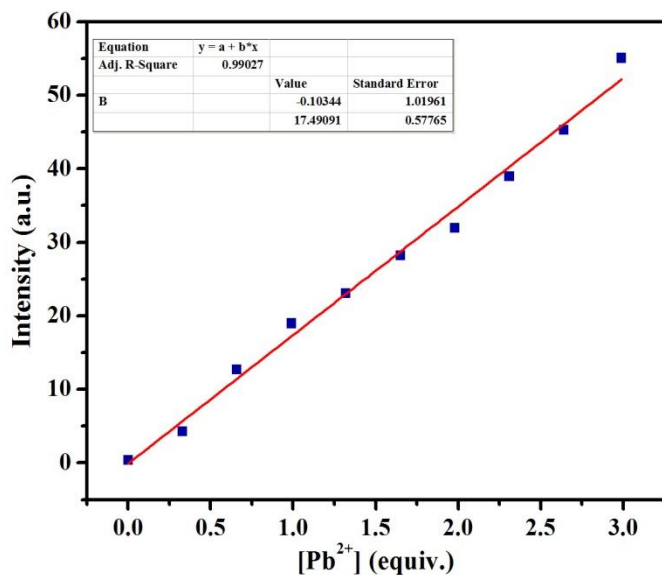

Fig. S60 Detection limit of **RHQ-3** ( $1 \times 10^{-5}$  M) towards the detection of  $Pb^{2+}$  in tap water.

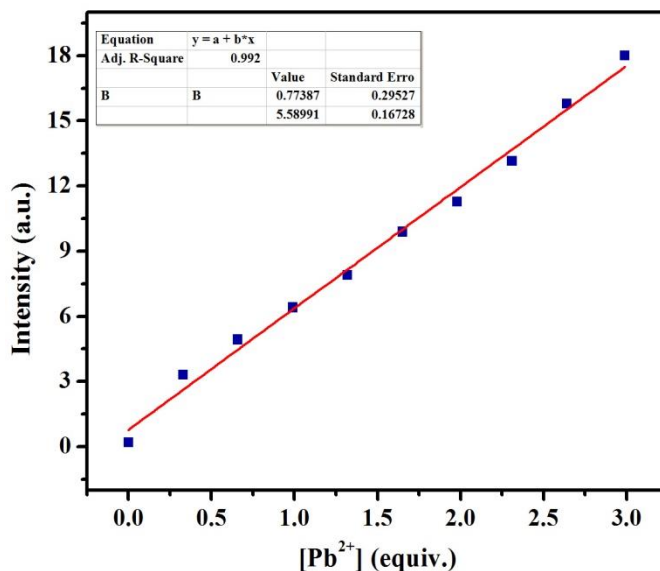

Fig. S61 Detection limit of **RHQ-4** ( $1 \times 10^{-5}$  M) towards the detection of  $Pb^{2+}$  in tap water.

## Comparison of detection limits

The detection limits of **RHQ-1, RHQ-2, RHQ-3 & RHQ-4** towards  $\text{Pb}^{2+}$  in tap water were determined from the following equation:

$$\text{DL} = 3 \cdot \text{SD} / \text{S}$$

Where SD is the standard deviation of the blank solution (**RHQ-1, RHQ-2, RHQ-3 & RHQ-4**, 10  $\mu\text{M}$ ) detected for 10 times; S is the slope of the calibration curve.

| S. No. | Standard Deviation | Slope                   | (3×Standard deviation)/Slope | Detection Limit         | Detection Limit    |
|--------|--------------------|-------------------------|------------------------------|-------------------------|--------------------|
| 1.     | 0.83               | $174.54894 \times 10^6$ | $0.0142 \times 10^{-6}$      | $1.42 \times 10^{-8}$ M | 14.2 nM            |
| 2.     | 0.74               | $37.80169 \times 10^6$  | $0.0587 \times 10^{-6}$      | $5.87 \times 10^{-8}$ M | 58.7 nM            |
| 3.     | 0.82               | $17.49091 \times 10^6$  | $0.1406 \times 10^{-6}$      | $1.40 \times 10^{-7}$ M | 0.14 $\mu\text{M}$ |
| 4.     | 0.80               | $5.58991 \times 10^6$   | $0.4293 \times 10^{-6}$      | $4.29 \times 10^{-7}$ M | 0.42 $\mu\text{M}$ |

**Table S1.** Comparison of **RHQs** with various reported rhodamine-based and other chemosensors for  $\text{Pb}^{2+}$ .

| Derivative                   | Solvent System             | Sensing                                                                             | Detection limit                                                                         | Application For $\text{Pb}^{2+}$ detection in Tap water             | Reference                                                                                                                           |
|------------------------------|----------------------------|-------------------------------------------------------------------------------------|-----------------------------------------------------------------------------------------|---------------------------------------------------------------------|-------------------------------------------------------------------------------------------------------------------------------------|
| <b>Our system (RHQs 1-4)</b> | ACN:H <sub>2</sub> O       | $\text{Pb}^{2+}$                                                                    | 17 nm, <b>6.91 nM</b> , 9.82 nM and 3 $\mu\text{M}$                                     | <b>14.2 nM</b> , 58.7 nM, 0.14 $\mu\text{M}$ and 0.42 $\mu\text{M}$ | <b>Present work</b>                                                                                                                 |
| RDP-1                        | HEPES                      | $\text{Pb}^{2+}$                                                                    | 15 nM                                                                                   |                                                                     | O. Sunnapu <i>et al.</i> , <i>RSC Adv.</i> <b>2016</b> , <i>6</i> , 656.                                                            |
| L                            | ACN:H <sub>2</sub> O       | $\text{Pb}^{2+}$ Fluorimetric & $\text{Cu}^{2+}$ colorimetric                       | $\text{Pb}^{2+}$ ( $2.5 \times 10^{-7}$ M) & $\text{Cu}^{2+}$ ( $5.8 \times 10^{-7}$ M) |                                                                     | M. Li <i>et al.</i> , <i>Dalton Trans.</i> <b>2015</b> , <i>44</i> , 17326.                                                         |
| Sensor 1                     | $\text{CHCl}_3$ : THF      | $\text{Pb}^{2+}$                                                                    |                                                                                         |                                                                     | L.-Q. Li <i>et al.</i> , <i>Spectrochimica Acta Part A: Molecular and Biomolecular Spectroscopy</i> <b>2014</b> , <i>122</i> , 722. |
| R1                           | MeOH:H <sub>2</sub> O      | $\text{Pb}^{2+}$ (Absorbance in Tris-HCl) and $\text{Cd}^{2+}$ (Fluorescence HEPES) |                                                                                         |                                                                     | L. Xu <i>et al.</i> , <i>RSC Advances</i> <b>2012</b> , <i>2</i> , 6323.                                                            |
| Chemosensor 1                | ACN                        | $\text{Pb}^{2+}$                                                                    | $10^{-4}$ M                                                                             |                                                                     | H. Ju <i>et al.</i> , <i>Talanta</i> <b>2011</b> , <i>83</i> , 1359.                                                                |
| RPU                          | Mixed ACN:H <sub>2</sub> O | $\text{Pb}^{2+}$ & $\text{Hg}^{2+}$                                                 | 7 nM and 35 nM                                                                          |                                                                     | Zhi-Qiang <i>et al.</i> , <i>Chem. Commun.</i> <b>2010</b> , <i>46</i> , 3765.                                                      |
| LF1                          | HEPES                      | $\text{Pb}^{2+}$                                                                    |                                                                                         |                                                                     | Q. He <i>et al.</i> , <i>J. Am. Chem. Soc.</i> <b>2006</b> , <i>128</i> , 9316.                                                     |
| 1                            | ACN                        | $\text{Pb}^{2+}$                                                                    |                                                                                         |                                                                     | J. Y. Kwon <i>et al.</i> , <i>J. Am. Chem. Soc.</i> <b>2005</b> , <i>127</i> , 10107.                                               |
| Probe 1                      | H <sub>2</sub> O:THF       | $\text{Pb}^{2+}$                                                                    | 10 nM                                                                                   | $\text{Pb}^{2+}$ using calibration method                           | A. Chatterjee <i>et al.</i> , <i>RSC Adv.</i> , 2014, <b>4</b> , 47076                                                              |
